# Supplementary material for: A Novel DCL2-Dependent Micro-Like RNA Vm-PC-3p-92107_6 Affects Pathogenicity by Regulating the Expression of Vm-VPS10 in Valsa mali
Source: Front Microbiol. 2021 Oct 1;12:721399. doi: 10.3389/fmicb.2021.721399 (PMC8575173; doi:10.3389/fmicb.2021.721399)
Supplement: Supplementary file 1 [file Presentation_1.ZIP]

Archive with 11 entries (10 files):
- Presentation_1.ZIP/
- Presentation_1.ZIP/Supplementary _Tables.xlsx
- Presentation_1.ZIP/Supplementary-Figure.S1.tif
- Presentation_1.ZIP/Supplementary-Figure.S2.tif
- Presentation_1.ZIP/Supplementary-Figure.S3.tif
- Presentation_1.ZIP/Supplementary-Figure.S4.tif
- Presentation_1.ZIP/Supplementary-Figure.S5.tif
- Presentation_1.ZIP/Supplementary-Figure.S6.tif
- Presentation_1.ZIP/Supplementary-Figure.S7.tif
- Presentation_1.ZIP/Supplementary-Figure.S8.tif
- Presentation_1.ZIP/Supplementary_Figures.docx
