# Supplementary material for: A Novel DCL2-Dependent Micro-Like RNA Vm-PC-3p-92107_6 Affects Pathogenicity by Regulating the Expression of Vm-VPS10 in Valsa mali
Source: Front Microbiol. 2021 Oct 1;12:721399. doi: 10.3389/fmicb.2021.721399 (PMC8575173; doi:10.3389/fmicb.2021.721399)
Supplement: Supplementary file 1 [file Presentation_1.ZIP › Presentation_1.ZIP/Supplementary _Tables.xlsx]

## Sheet: Table S1
Table S1 Primers used in this study
Primer	Sequence(5'-3')	Purpose
Vm-PC-3p-92107_6-OE-F	TCCCTAGCTCATGTCCCTATGGTCA	Generation of Vm-PC-3p-92107_6 overexpression construct
Vm-PC-3p-92107_6-OE-R	CATGCCGCTTGGCTCGACGAGATCC
Mut-PC-3p-92107_6-F	ACAGAACCAATAGCCAGCCTGGCCTGCTTAGCAATGGCCG	Generation of mutated Vm-PC-3p-92107_6 (Mut-Vm-PC-3p-92107_6) expression construct
Mut-PC-3p-92107_6-R	CGGCCATTGCTAAGCAGGCCAGGCTGGCTATTGGTTCTGT
pDL2-mexp-F	ATCATTCCACTCAACATTCAGGC	pDL2 vector cloning
pDL2-mexp-R	TTTGAAGATTGGGTTCCTACGAA
pDL2-mexp-JC-F	CGTTGTCGCCTAACAGATC	Overexpression transformants detection
pDL2-mexp-JC-R	GGGTATTGCCTTTGGACTT
RT-Vm-PC-3p-92107_6	GTCGTATCCAGTGCAGGGTCCGAGGTATTCGCACTGGATACGACTGCCAAGC	Reverse transcription of Vm-PC-3p-92107_6
Vm-PC-3p-92107_6-F	TGCCTCGCAAGACTGTCCT	PCR/Real-time PCR of Vm-PC-3p-92107_6
Universal R	GTGCAGGGTCCGAGGT
RT-VmU6	GCTTTCTTTGGTATAGCGTGTCA	Reverse transcription of VmU6
VmU6-F	GGTCAATTTGAAACAATACAGAGAAGAT	PCR/Real-time PCR of VmU6
VmU6-R	TCTTTGGTATAGCGTGTCATCCTTAG
Vm-PC-3p-92107_6-1F	GCCTGGTATGCAAATGAGTT	Vm-PC-3p-92107_6 deletion and deletion mutant detection
Vm-PC-3p-92107_6-2R	CAGATACGGCAGAGAAATCGCAACCTCTTTAGAAAGGGCCCTCGC
Vm-PC-3p-92107_6-3F	GTTTAGATTCCAAGTGTCTACTGCTGGCCCGAAACATAGTAAGCAGTT
Vm-PC-3p-92107_6-4R	TGAATGATAAGACCGAGACA
Vm-PC-3p-92107_6-5F	GACCCAAGCAGGGCAGTC
Vm-PC-3p-92107_6-6R	CCATTGCCAAGCAGGACA
Vm-PC-3p-92107_6-CF	GGGAATTACAAGAGTCCGAG
Vm-PC-3p-92107_6-CR	AATGATAAGACCGAGACAGCA
GEN-F	GAGGTTGCGATTTCTCTGCCGTATCTG
GEN-R	GCCAGCAGTAGACACTTGGAATCTAAAC
Vm-PC-3p-92107_6-7F	TTTTGAAGCAACAGTTGAGAA
Vm-PC-3p-92107_6-8R	TTTGAAGGAGGTATTCACAGA
G852	TCGGCTATGACTGGGCACAACA
G850	GAGCGGCGATACCGTAAAGCAC
G856F	GAATGGTCAAATCAAACTGCTAGATAT
G855R	TGATGAGCAGGTGGTAAGAGG
NEO-F	GAGGTTGCGATTTCTCTGCCGTATCTG
NEO-R	GCCAGCAGTAGACACTTGGAATCTAAAC
VmG6PDH-F	TCAGAACAAGTTCGAGGGCGACAA	Real-time PCR & RT-PCR
VmG6PDH-R	TGAGGGCAATAGAGGGCTTGTTCA
qVm-VPS10-F	GGGGTACGGAATACGACAAACA
qVm-VPS10-R	CGCAAAGGGGATGGTGATG
Vm-VPS10-1F	ACGTTACCCTGTCCGACTAAG	Target gene deletion and gene deletion mutant detection
Vm-VPS10-2R	CAGATACGGCAGAGAAATCGCAACCTCCGAACTGGGAGATGGTCTAG
Vm-VPS10-3F	GTTTAGATTCCAAGTGTCTACTGCTGGCATAGGAGGGTAGATAGGTAGGTAA
Vm-VPS10-4R	CCAGGATGCCCGTTGAC
Vm-VPS10-CF	ATTGGCGGGTCGTTGGTG
Vm-VPS10-CR	TCCGAGAACTTCCATTACGC
Vm-VPS10-5F	ACCGCTTGGTCGTTTCG
Vm-VPS10-6R	CTGTTGGGAGGTGATGTTAG
Vm-VPS10-7F	CTTCCACAACACGCCCAC
Vm-VPS10-G855R	GCTGACCGCTTCCTCGTGC
Vm-VPS10-G856F	GCTGACCGCTTCCTCGTGC
Vm-VPS10-8R	TCTGTCAAGACGACCCACGA
Vm-PC-3p-92107_6-OE2-F	ACGGGGGACTCTTGACCATGGTCCCCGAAGTCACTGGTAGC	Co-conversion test of the primers of fragment amplification and detection
Vm-PC-3p-92107_6-OE2-R	GGGGAAATTCGAGCTGGTCACCTGTTCTTATCCGTTCTTTCTCAT
Vm-VPS10-F	GGGGACTCTTGACCATGGTAGGCGTTACGGCTCAGGA
Vm-VPS10-R	CTCACCATCCTAGGACTAGTTGCCCCTCGCAAAACTG
1302-35S-F	CTATCCTTCGCAAGACCCTTC
1302-NOST-R	TCATAAAAACCCATCTCATAAAT
1302-eGFP-F	CTCCTCGCCCTTGCTCACCAT
1302-eGFP-R	ATGGTCCTGCTGGAGTTC

## Sheet: Table S2
Table S2 Results of small RNAs sequencing of in vitro mycelium (MVm) and DCL2 deletion mutant of V. mali (MD2)
	MVm				MD2
	Total	% of total	Unique	% of uniqe	Total	% of total	Unique	% of uniqe
Raw reads	12818591	100	2306832	100	11565746	100	1690360	100
3ADT&length filter	6052333	47.22	1125430	48.79	5825970	50.36	1002396	59.3
Junk reads	15515	0.12	9099	0.39	12782	0.11	6945	0.41
Rfam	1678191	13.09	58857	2.55	1156437	10	48330	2.9
mRNA	105086	0.82	88940	3.86	46757	0.4	38284	2.3
Repeats	28784	0.22	1749	0.08	28940	0.25	1147	0.07
Valid reads	4941232	38.55	1023889	44.39	4496933	38.88	593982	35.14

## Sheet: Table S3
Table S3 Vm-milRNAs identified in this study and their expression levels
Index	miR_name	miR_seq	up/down	fold_change(MD2/MVm)	log2(fold_change)	pvalue(chi_square_2x2)	pvalue(fisher_test)	MVm(norm)	MD2(norm)	MVm(raw)	MD2(raw)	Expression level
1	PC-5p-31952_22	TACTCCAGTTGGATTAAGGCGG	down	0.107923	-3.21193	3.1855e-15	2.14707e-17	103.06	11.1225	144	8	middle
2	PC-3p-34075_20	TCCAGTTGGATTAAGGCGGT	down	0.132628	-2.91455	2.174e-23	4.87548e-26	178.208	23.6353	249	17	middle
3	PC-5p-164768_3	AGGCTGCTGTGTGTTAGACGT	down	0.161884	-2.62697	0.00037449	0.000172872	25.765	4.17093	36	3	middle
4	PC-5p-10035_77	TCTGACGATTGAATACTGACG	down	0.283414	-1.81902	2.8149e-56	1.45334e-59	740.742	209.937	1035	151	high
5	PC-3p-92107_6	TCGCAAGACTGTCCTGCTTGGCA	down	-inf	-inf	4.3919e-11	5.65731e-14	50.0985	0	70	0	middle
6	PC-5p-2366_295	TAGGTTTGAGAGATCTTCAGG	down	0.635398	-0.654268	1.3947e-08	1.13143e-08	763.645	485.218	1067	349	high
7	PC-5p-1651_406	TGAAGATCTCTCAAACCTACGGT		1.15308	0.205496	1.7602e-25	2.01025e-25	1537.31	1772.64	2148	1275	high
8	PC-3p-15073_50	AGGACGCAGCAAAGCGAGGCTC		1.29596	0.374018	4.3376e-14	5.00696e-14	522.456	677.081	730	487	high
9	PC-3p-3147_232	TGCGAGATCTCTTAAAGC	down	1.71745	0.780264	2.5305e-23	2.71723e-23	290.214	498.426	405.5	358.5	high
10	PC-5p-9869_78	TGCGAGATCTCTTAAAGCTAGGTTC	down	1.9075	0.931682	2.8052e-07	2.67241e-07	59.4025	113.31	83	81.5	middle
11	PC-5p-62042_10	GCTTTGGTCGACGGCAGAACA		1.53013	0.613659	0.00099464	0.00107558	52.2456	79.9428	73	57.5	middle
12	PC-5p-92307_6	TAGAACTTAGAAGGTAGAGA	down	-inf	-inf	0.0011909	0.00066763	12.1668	0	17	0	middle
13	PC-3p-149663_4	TGATAGTTGGTTCGTGGTAGT	down	-inf	-inf	0.0091475	0.00900061	7.87263	0	11	0	low
14	PC-5p-128213_4	TAACTATAAGTAGAGCGCTC	down	-inf	-inf	0.006479	0.00467593	8.58832	0	12	0	low
15	PC-3p-4530_168	TTGGGCACGTTGGGCTTTG		0.651278	-0.618654	0.0044351	0.00446138	247.63	161.276	346	116	high
16	PC-5p-122130_5	TAGGCGTAAACTCTATTCGT	down	0.0693788	-3.84936	0.0089193	0.0140506	10.0197	0.695155	14	0.5	middle
17	PC-5p-136623_4	TCGGCTTAGTATCGGTAACGT	down	0.121413	-3.04201	0.010736	0.00793578	11.4511	1.39031	16	1	middle
18	PC-3p-355705_2	AGGCCTAATATCGTATCGCGGG	down	0.138758	-2.84936	0.020748	0.0140582	10.0197	1.39031	14	1	middle
19	PC-3p-197143_3	TAGGGTTTATATTGTTAGAGA	down	-inf	-inf	0.018399	0.0337773	6.44124	0	9	0	low
20	PC-5p-191126_3	TCGCTATAAGTCTTAGAACTAT	down	-inf	-inf	0.018399	0.0337773	6.44124	0	9	0	low
21	PC-5p-257804_2	TAGATAGAACTTAAAAGGTAGA	down	-inf	-inf	0.012952	0.0173999	7.15693	0	10	0	low
22	PC-5p-352109_2	TTTAGTAGATTTATAAGCGT	down	-inf	-inf	0.018399	0.0337773	6.44124	0	9	0	low
23	PC-5p-109000_5	AAGTATTTCGGATTATCGGGCG	down	-inf	-inf	0.021963	0.0337773	6.08339	0	8.5	0	low
24	PC-5p-286351_2	AAAGTATTTCGGATTATCGGGCT	down	-inf	-inf	0.026245	0.0337843	5.72555	0	8	0	low
25	PC-3p-339225_2	TGCGTGCTGCAAACGGTGAG	up	3.49669	1.80599	0.011305	0.0144228	3.57847	12.5128	5	9	middle
26	PC-3p-63921_10	TAGAAACCAACAAAATAGAAC		1.1516	0.203645	0.018499	0.0192131	119.521	137.641	167	99	middle
27	PC-5p-185812_3	AGTATTTCGGATTATCGGGCA	down	-inf	-inf	0.045147	0.0658707	4.65201	0	6.5	0	low
28	PC-5p-176690_3	AAGTATTTCGGATTATCGGGCA	down	-inf	-inf	0.037623	0.0658615	5.00985	0	7	0	low
29	PC-3p-1339986_1	CTAGATAAATTTATAGGGCTT	down	-inf	-inf	0.037623	0.0658615	5.00985	0	7	0	low
30	PC-5p-242391_2	TCGCTATAAGTCTTAGAACTAA	down	-inf	-inf	0.037623	0.0658615	5.00985	0	7	0	low
31	PC-5p-248229_2	TAGGCGGCGTTAGTAAAGCTCTT	down	0.176601	-2.50144	0.056016	0.0436153	7.87263	1.39031	11	1	low
32	PC-3p-183645_3	ATATTAGGGATAGTAGTAAGCTA	down	0.342813	-1.54451	0.091936	0.130172	12.1668	4.17093	17	3	middle
33	PC-5p-168333_3	TTACTTAAAGCTATCCGGAT	down	-inf	-inf	0.054273	0.129027	4.29416	0	6	0	low
34	PC-5p-156899_4	TCCGGAGTTCTAGGAGCTAA	down	-inf	-inf	0.078937	0.129038	3.57847	0	5	0	low
35	PC-5p-217324_2	AAAGTATTTCGGATTATCGGGT	down	-inf	-inf	0.078937	0.129038	3.57847	0	5	0	low
36	PC-5p-231631_2	AAGTATTTCGGATTATCGGGT	down	0.138758	-2.84936	0.10211	0.226258	5.00985	0.695155	7	0.5	low
37	PC-5p-154844_4	TACCGGTTATAGATAAGTAC	down	0.259014	-1.9489	0.17965	0.226282	5.3677	1.39031	7.5	1	low
38	PC-5p-661882_1	TACCCTATAGGGAGAGGTCGGCGTA	down	0.323768	-1.62697	0.29614	0.38169	4.29416	1.39031	6	1	low
39	PC-3p-1350525_1	TGCCGTAGGGCTGGGAACATGGATC		0.582782	-0.778973	0.52195	0.560812	7.15693	4.17093	10	3	low
40	PC-3p-788624_1	TCGCATCCGGTCTGCGGCCT		0.647535	-0.626969	0.79178	1	2.14708	1.39031	3	1	low
41	PC-3p-38264_18	TAGTCCTTCCTCCAGCTACCGC		0.868354	-0.203645	0.96584	1	77.6527	67.43	108.5	48.5	middle
42	PC-3p-1290049_1	TCGGAAAGGAAGATGGAGTTCGA		0.971303	-0.042007	0.92026	1	1.43139	1.39031	2	1	low
43	PC-5p-982645_1	TAGTTTCCCTAGAGCTTATAGACCA		0.971303	-0.042007	0.84125	1	5.72555	5.56124	8	4	low
44	PC-3p-465059_1	TCGAGATTATCGAGGATAACGAA	down	-inf	-inf	0.43211	1	0.715693	0	1	0	low
45	PC-3p-766776_1	GCGGCCCTTATAATTAAACTAA	down	-inf	-inf	0.43211	1	0.715693	0	1	0	low
46	PC-3p-979118_1	TAAAAAGGAGTAGAGTATCTCTT	down	-inf	-inf	0.1161	0.254024	2.86277	0	4	0	low
47	PC-3p-1200043_1	TAGTCTAGTCTCTTAAACCTATT	down	-inf	-inf	0.43211	1	0.715693	0	1	0	low
48	PC-3p-899400_1	TAGACTTTATAGGAGTTCGGGA	down	-inf	-inf	0.26656	1	1.43139	0	2	0	low
49	PC-3p-1482743_1	TTCTTTAGCATTGTATCCTGAGT	down	-inf	-inf	0.43211	1	0.715693	0	1	0	low
50	PC-3p-1303388_1	TAGGGGGTATATACTATAGAGC	down	-inf	-inf	0.17358	0.502683	2.14708	0	3	0	low
51	PC-3p-548890_1	TTTAGCTGTAAATTCTAGTTA	down	-inf	-inf	0.43211	1	0.715693	0	1	0	low
52	PC-3p-629838_1	TTTATACGCCGACTTGCCCC	down	-inf	-inf	0.43211	1	0.715693	0	1	0	low
53	PC-3p-807970_1	TACGCTATAAAGCTCGGATACCTA	down	-inf	-inf	0.26656	1	1.43139	0	2	0	low
54	PC-3p-1519037_1	TAAAGCTCGGACGATTATATA	down	-inf	-inf	0.17358	0.502683	2.14708	0	3	0	low
55	PC-5p-263235_2	TAAGCTAGTAGTATATCTATA	down	-inf	-inf	0.26656	1	1.43139	0	2	0	low
56	PC-3p-1082382_1	GGTTATAGTCGGAGCCCTTA	down	-inf	-inf	0.26656	1	1.43139	0	2	0	low
57	PC-3p-855772_1	TCTCGAATACTTATAGCTTCTCTC	down	-inf	-inf	0.26656	1	1.43139	0	2	0	low
58	PC-3p-661282_1	TCGGATCCTTATAATAATCGTATG	down	-inf	-inf	0.17358	0.502683	2.14708	0	3	0	low
59	PC-3p-704109_1	TATAGTAAATCGCTGCGTCTA	down	-inf	-inf	0.43211	1	0.715693	0	1	0	low
60	PC-5p-87884_7	TAAATACAATATGGACTGGT		1.45695	0.542956	0.2306	0.285482	8.58832	12.5128	12	9	middle
61	PC-5p-292833_2	TTGGTGTAGGACAAGCAACA		1.66509	0.735601	0.2355	0.282971	5.00985	8.34186	7	6	low

## Sheet: Table S4
Table S4 Cluster index of pre-miRNAs
Item	Description
Pre-miRNA Index	Pre-miRNA Cluster Index
miRNA_Index	mature miRNA
miR_name	The miR_name is composed of the 1st known miR name in a cluster, a underscore, and a matching annotation: such as
	L-n means the miRNA_seq (detected) is n base less than known rep_miRSeq in the left side;
	R-n means the miRNA_seq (detected) is n base less than known rep_miRSeq in the right side;
	L+n means the miRNA_seq (detected) is n base more than known rep_miRSeq in the left side;
	R+n means the miRNA_seq (detected) is n base more than known rep_miRSeq in the right side;
	2ss5TC13TA means 2 substitution (ss), which are T->C at position 5 and T->A at position 13
	if there is no matching annotation, the miRNA_seq (detected) is exactly same as known rep_miRSeq.
	New discovered 5p/3p sequence has been annotated as p3/p5: which is directly differentiate with the reported sequences,
miR_seq	is a read at 5' or 3' of maximum mapped score in each cluster.
len	miR_seq length
genome ID	Reference Genome Information
strand	strand "+" or "-"
start	pre-miRNA start position
end	Pre-miRNA end position
pre-miRNA_seq	pre-miRNA sequence
#mir/MIR	mapped mir numbers in miRbase, the number in this item eaquals to the sum of mirIDs
mirIDs	is all mirID in a cluster, seprated by ,
rep_mirID	is the representative known mirID
rep_mirSeq	is the representative known mir sequence
rep_miRID	is the representative known miRID
rep_miRSeq	is the representative known miR sequence
type	is 5' or 3', which means the cluster appears at 5' or 3' end
Sequence in miRbase	New, miRNA identified in this study and not reported in miRBase,mainly for new reported 5p or 3p sequence; Diff, confirming miRNA sequences in miRBase, but different sequences are reported in our study; and Yes, confirming miRNA sequences in miRBase.
	gp4:Reads were not mapped to pre-miRNAs of selected species in miRbase. But the reads were mapped to genome & the extended genome sequences from genome may form hairpins.
SS	Secondary Structure
	Criteria:
	1.number of nucleotides in one bulge in stem : <= 12
	2.number of base pairs in the stem region of the predicted hairpin : >= 16
	3.cutoff of free energy : kCal/mol <= -15
	4.length of hairpin : up and down stems + terminal loop >= 50
	5.length of hairpin loop : <= 200
	6.number of nucleotides in one bulge in mature region : <= 4
	7.number of biased errors in one bulge in mature region: <= 2
	8.number of biased bulges in mature region : <= 2
	9.number of errors in mature region : <= 4
	10.number of base pairs in the mature region of the predicted hairpin : >= 12
	11.percent of mature in stem : >= 80
hairpinLen	pre-miRNA length
CG%	GC Content
dG	Free energy
MFEI	MFEI = -dG*100/mirLen/CG%. Reference: Cell. Mol. Life Sci. 63 (2006) 246-254.
raw	Raw data; from #reads(all),is the number of reads for isoform at 5' or 3' end.
norm	Normalized data
Expression Level	High:The number of reads in the following reported miRNAs is higher than the average copy of the data set.Medium:The number of reads in the following reported miRNAs is higher than 10 and less than average copy of the data set.Low:The number of reads in the following reported miRNAs is less than 10
Summary of known and predicted miRNA in this study.
Pre-miRNA Index	miRNA_Index	miR_name	miR_seq	len	genomeID	strand	start	end	pre-miRNA_seq	#mir/MIR	mirIDs,	rep_mirID	rep_mirSeq	rep_miRID	rep_miRSeq	type	Sequence in miRbase	group	SS	hairpinLen	CG%	dG	MFEI	MVm(raw)	MD2(raw)	MVm(norm)	MD2(norm)	Expression level
1	1	PC-5p-154844_4	TACCGGTTATAGATAAGTAC	20	chr01	+	2633222	2633395	cattaaatatagtaatatatatatatactctctaacaatataaacccTACCGGTTATAGATAAGTACtcttataaagattaccctaagagtacttatctataaccggTAGGGTTTATATTGTTAGAGAgtatatatatatattactatatttacagacaataacactaccgagc	0						5'	New	gp4	...(((((((((((((((((((((((((((((((((((((((((((((((((((((((((((((((((((((............))))))))))))))))))))))))))))))))))))))))))))))))))))))))))))))))))))).....................	150	27	-104.5	2.2	7.5	1	5.3677	1.39031	low
1	2	PC-3p-197143_3	TAGGGTTTATATTGTTAGAGA	21	chr01	+	2633222	2633395	cattaaatatagtaatatatatatatactctctaacaatataaacccTACCGGTTATAGATAAGTACtcttataaagattaccctaagagtacttatctataaccggTAGGGTTTATATTGTTAGAGAgtatatatatatattactatatttacagacaataacactaccgagc	0						3'	New	gp4	...(((((((((((((((((((((((((((((((((((((((((((((((((((((((((((((((((((((............))))))))))))))))))))))))))))))))))))))))))))))))))))))))))))))))))))).....................	150	27	-104.5	2.2	9	0	6.44124	0	low
2	1	PC-5p-154844_4	TACCGGTTATAGATAAGTAC	20	chr01	-	2633265	2633418	tgtaaatatagtaatatatatatatactctctaacaatataaacccTACCGGTTATAGATAAGTACtcttagggtaatctttataagagtacttatctataaccggTAGGGTTTATATTGTTAGAGAgtatatatatatattactatatttaat	0						5'	New	gp4	..(((((((((((((((((((((((((((((((((((((((((((((((((((((((((((((((((((((..(......)..)))))))))))))))))))))))))))))))))))))))))))))))))))))))))))))))))))))..	150	24	-108.4	2.9	7.5	1	5.3677	1.39031	low
2	2	PC-3p-197143_3	TAGGGTTTATATTGTTAGAGA	21	chr01	-	2633265	2633418	tgtaaatatagtaatatatatatatactctctaacaatataaacccTACCGGTTATAGATAAGTACtcttagggtaatctttataagagtacttatctataaccggTAGGGTTTATATTGTTAGAGAgtatatatatatattactatatttaat	0						3'	New	gp4	..(((((((((((((((((((((((((((((((((((((((((((((((((((((((((((((((((((((..(......)..)))))))))))))))))))))))))))))))))))))))))))))))))))))))))))))))))))))..	150	24	-108.4	2.9	9	0	6.44124	0	low
3	3	PC-5p-122130_5	TAGGCGTAAACTCTATTCGT	20	scaffold00304	-	741	961	tatttcgtactataaatcttaaaggttataaagatagaaaagtgccccgaatagcctaataaagagtataaagtaacgaagttcctgcTAGGCGTAAACTCTATTCGTctcgtataatctacttagataattaaagcagaattataactataaatagcttaggctaccctagataatataaTCGAGATTATCGAGGATAACGACtagaatttatagctaaa	0						5'	New	gp4	.((((((((((.((..((((..(((((((.....................)))))))....))))...)).))).)))))))........((((((((.((((.((((((((.(((((((......((((((.......))))))..(((....((((....))))...)))............)))))))))))....)))).)))).))))).)))...	128	30.8	-41.6	0.6	14	0.5	10.0197	0.695155	middle
3	4	PC-3p-465059_1	TCGAGATTATCGAGGATAACGAA	23	scaffold00304	-	741	961	tatttcgtactataaatcttaaaggttataaagatagaaaagtgccccgaatagcctaataaagagtataaagtaacgaagttcctgcTAGGCGTAAACTCTATTCGTctcgtataatctacttagataattaaagcagaattataactataaatagcttaggctaccctagataatataaTCGAGATTATCGAGGATAACGACtagaatttatagctaaa	0						3'	New	gp4	.((((((((((.((..((((..(((((((.....................)))))))....))))...)).))).)))))))........((((((((.((((.((((((((.(((((((......((((((.......))))))..(((....((((....))))...)))............)))))))))))....)))).)))).))))).)))...	128	30.8	-41.6	0.6	1	0	0.715693	0	low
4	3	PC-5p-122130_5	TAGGCGTAAACTCTATTCGT	20	scaffold00086	-	5090	5306	tcgtactataaatcttaaaggttataaagatagaaaagtgccccgaatagcctaataaagagtataaagtaacgaagttcctgcTAGGCGTAAACTCTATTCGTctcgtataatctacttagataattaaagcagaattataactataaatagcttaggctaccctagataatataatcgagattatcgaggataacgactagaatttatagctaaa	0						5'	New	gp4	(((((((.((..((((..(((((((.....................)))))))....))))...)).))).))))...........((((((((.((((.((((((((.(((((((......((((((.......))))))..(((....((((....))))...)))............)))))))))))....)))).)))).))))).)))...	128	31.3	-39	0.6	14	0.5	10.0197	0.695155	middle
5	5	PC-5p-191126_3	TCGCTATAAGTCTTAGAACTAT	22	scaffold00246	+	606	771	tccgggaataataggataaacgcttTCGCTATAAGTCTTAGAACTATataagctatagatcttataggctttaatagctttagctatatctatctaaagccctttctaaaaataaagtcctcggatccttataataattatatcGCGGCCCTTATAATTAAACTTA	0						5'	New	gp4	((((((.......(((((...(((...(((((((((((.(((.(((((.....))))).)))...))))))..)))))...)))..)))))..........((((........))))..)))))).........((((((((..........))))))))......	78	31.3	-31.7	0.6	9	0	6.44124	0	low
5	6	PC-3p-766776_1	GCGGCCCTTATAATTAAACTAA	22	scaffold00246	+	606	771	tccgggaataataggataaacgcttTCGCTATAAGTCTTAGAACTATataagctatagatcttataggctttaatagctttagctatatctatctaaagccctttctaaaaataaagtcctcggatccttataataattatatcGCGGCCCTTATAATTAAACTTA	0						3'	New	gp4	((((((.......(((((...(((...(((((((((((.(((.(((((.....))))).)))...))))))..)))))...)))..)))))..........((((........))))..)))))).........((((((((..........))))))))......	78	31.3	-31.7	0.6	1	0	0.715693	0	low
6	7	PC-5p-168333_3	TTACTTAAAGCTATCCGGAT	20	scaffold00097	+	7432	7586	taaaccttatccggaaagcggtaaagtatttaTTACTTAAAGCTATCCGGATatagtaaaataccgagcatatattaagcttagtaaattatttcgctttAAAAAAGGAGTAGAGTATCTCTTtaattaaaggaagcggataatagttctattat	0						5'	New	gp4	...((..((((((((.(((..(((.(((.....))))))..))).))))))))..))....(((..(((.........)))..))).((((.((((((((....((((((........))))))........))))))))))))...........	54	29	-39.6	0.9	6	0	4.29416	0	low
6	8	PC-3p-979118_1	TAAAAAGGAGTAGAGTATCTCTT	23	scaffold00097	+	7432	7586	taaaccttatccggaaagcggtaaagtatttaTTACTTAAAGCTATCCGGATatagtaaaataccgagcatatattaagcttagtaaattatttcgctttAAAAAAGGAGTAGAGTATCTCTTtaattaaaggaagcggataatagttctattat	0						3'	New	gp4	...((..((((((((.(((..(((.(((.....))))))..))).))))))))..))....(((..(((.........)))..))).((((.((((((((....((((((........))))))........))))))))))))...........	54	29	-39.6	0.9	4	0	2.86277	0	low
7	9	PC-5p-257804_2	TAGATAGAACTTAAAAGGTAGA	22	scaffold00059	+	84354	84598	tagggttaattataagcgataggtgttaggctctaaataacacagtaggttacgtaacggattaagccctgccggcttataaaaggggtagccctaggcccttcTAGATAGAACTTAAAAGGTAGAgactagcttccttttagccctatagtaaattactgcgtctgcgctacttaattactaagtctaccctgcttactctacctataattctatctctaaTAGTCTAGTCTCTTAAACCTATT	0						5'	New	gp4	..(((((..((((((((.....((((((.........)))))).(((((..................)))))..))))))))((((((.....((((((..((..((((((((.(((..((((((((...(((.......(((..((.((((((......(((....))).......)))))))).)))....)))..)))))))).)))))))))))..))..)))))))))))).)))))...	154	39.2	-61.4	0.6	10	0	7.15693	0	low
7	10	PC-3p-1200043_1	TAGTCTAGTCTCTTAAACCTATT	23	scaffold00059	+	84354	84598	tagggttaattataagcgataggtgttaggctctaaataacacagtaggttacgtaacggattaagccctgccggcttataaaaggggtagccctaggcccttcTAGATAGAACTTAAAAGGTAGAgactagcttccttttagccctatagtaaattactgcgtctgcgctacttaattactaagtctaccctgcttactctacctataattctatctctaaTAGTCTAGTCTCTTAAACCTATT	0						3'	New	gp4	..(((((..((((((((.....((((((.........)))))).(((((..................)))))..))))))))((((((.....((((((..((..((((((((.(((..((((((((...(((.......(((..((.((((((......(((....))).......)))))))).)))....)))..)))))))).)))))))))))..))..)))))))))))).)))))...	154	39.2	-61.4	0.6	1	0	0.715693	0	low
8	11	PC-5p-185812_3	AGTATTTCGGATTATCGGGCA	21	chr07	-	830547	830650	tagaatcggaatagggaaAGTATTTCGGATTATCGGGCCtagcgctcggagattagctatagctaaataaagtattttaagcccttataatccgtaagtacgat	0						5'	New	gp4	...................((((((((((((((.((((.(((.(((......(((((....)))))....)))...))).))))..)))))))).))))))...	82	38.5	-26.4	0.7	6.5	0	4.65201	0	low
9	11	PC-5p-185812_3	AGTATTTCGGATTATCGGGCA	21	chr07	-	834995	835102	taagtagaatcggaatagggaaAGTATTTCGGATTATCGGGCCtagcgctcggagattagctatagctaaataaagtattttaagcccttataatccgtaagtacgat	0						5'	New	gp4	.......................((((((((((((((.((((.(((.(((......(((((....)))))....)))...))).))))..)))))))).))))))...	82	38	-26.4	0.6	6.5	0	4.65201	0	low
10	12	PC-5p-156899_4	TCCGGAGTTCTAGGAGCTAA	20	chr01	-	1166872	1166989	actcggtaatttattTCCGGAGTTCTAGGAGCTAAtcccgtagtatattataaagTAGACTCTATAGGAGTTCGGGAatatagctatcgttacccggctttaagcggatataatagtt	0						5'	New	gp4	...(((((...((((((((((.((((((((((((.....((((....))))....))).)))).))))).))))))))))....)))))....(((........)))...........	86	38.1	-29.3	0.7	5	0	3.57847	0	low
10	13	PC-3p-899400_1	TAGACTTTATAGGAGTTCGGGA	22	chr01	-	1166872	1166989	actcggtaatttattTCCGGAGTTCTAGGAGCTAAtcccgtagtatattataaagTAGACTCTATAGGAGTTCGGGAatatagctatcgttacccggctttaagcggatataatagtt	0						3'	New	gp4	...(((((...((((((((((.((((((((((((.....((((....))))....))).)))).))))).))))))))))....)))))....(((........)))...........	86	38.1	-29.3	0.7	2	0	1.43139	0	low
11	14	PC-5p-62042_10	GCTTTGGTCGACGGCAGAACA	21	chr02	-	2786908	2787133	tttgacatgtcctgccgtcgaccaaagcacggttaagggccgagccgatggtggaagaagccgtcgaggaattcaccctataatttGCTTTGGTCGACGGCAGAACAgttgtgaaacgataagtcagaaaatcacgttggcatcatttgcaaactcaaaaggaatttcatcggcagaTGCGTGCTGCAAACGGTGAGgatgggtggagtgttcggtgaagctcaag	0						5'	New	gp4	((((((..((.((((((((((((((((((......((((..(((.(((((((.......))))))).....))).))))......)))))))))))))))))).)).(((....))).....))))))........(((((.((((......((((.........(((((((((((.......))))...)))))))........)))).....)))).)).))).	98	49.6	-79.9	0.7	73	57.5	52.2456	79.9428	middle
11	15	PC-3p-339225_2	TGCGTGCTGCAAACGGTGAG	20	chr02	-	2786908	2787133	tttgacatgtcctgccgtcgaccaaagcacggttaagggccgagccgatggtggaagaagccgtcgaggaattcaccctataatttGCTTTGGTCGACGGCAGAACAgttgtgaaacgataagtcagaaaatcacgttggcatcatttgcaaactcaaaaggaatttcatcggcagaTGCGTGCTGCAAACGGTGAGgatgggtggagtgttcggtgaagctcaag	0						3'	New	gp4	((((((..((.((((((((((((((((((......((((..(((.(((((((.......))))))).....))).))))......)))))))))))))))))).)).(((....))).....))))))........(((((.((((......((((.........(((((((((((.......))))...)))))))........)))).....)))).)).))).	98	49.6	-79.9	0.7	5	9	3.57847	12.5128	middle
12	16	PC-5p-87884_7	TAAATACAATATGGACTGGT	20	chr10	+	741404	741608	tatggttgtcgtggtaacaatttagagagaatatatgccttttctgtccagtccatgttgtatttcgagatcaTAAATACAATATGGACTGGTccagtgatcaggcagaaccccactgaggcagtatctcataccattgagtcttttgtcactgttctggacaccaatgttgcccagtgagcTTCTTTAGCATTGTATCCTGAGT	0						5'	New	gp4	........(((.((..(((((((((((((......(((((...(((.((((((((((((((((((.........))))))))))))))))))..))).....)))))......(((((.((((..((((((......)))).....((((.........))))...))..)))))))))...)))))))).)))))..)))))..	72	42	-66.2	0.8	12	9	8.58832	12.5128	middle
12	17	PC-3p-1482743_1	TTCTTTAGCATTGTATCCTGAGT	23	chr10	+	741404	741608	tatggttgtcgtggtaacaatttagagagaatatatgccttttctgtccagtccatgttgtatttcgagatcaTAAATACAATATGGACTGGTccagtgatcaggcagaaccccactgaggcagtatctcataccattgagtcttttgtcactgttctggacaccaatgttgcccagtgagcTTCTTTAGCATTGTATCCTGAGT	0						3'	New	gp4	........(((.((..(((((((((((((......(((((...(((.((((((((((((((((((.........))))))))))))))))))..))).....)))))......(((((.((((..((((((......)))).....((((.........))))...))..)))))))))...)))))))).)))))..)))))..	72	42	-66.2	0.8	1	0	0.715693	0	low
13	18	PC-5p-176690_3	AAGTATTTCGGATTATCGGGCA	22	chr01	-	334838	334988	ttaagtaaaatcggaatagggaAAGTATTTCGGATTATCGGGCCtagtatttaaaaattaactatagctaaataaagtactttaagcccttataatccgtaaatataataaaTAGGGAGTATATACTATAGAGCtcggataattatactat	0						5'	New	gp4	...((((..(((.((.........((((((((((((((.((((..(((((((......................)))))))....))))..)))))))).)))))).....((((..........)))).....)).))).....))))..	82	27.8	-28	0.7	7	0	5.00985	0	low
13	19	PC-3p-1303388_1	TAGGGGGTATATACTATAGAGC	22	chr01	-	334838	334988	ttaagtaaaatcggaatagggaAAGTATTTCGGATTATCGGGCCtagtatttaaaaattaactatagctaaataaagtactttaagcccttataatccgtaaatataataaaTAGGGAGTATATACTATAGAGCtcggataattatactat	0						3'	New	gp4	...((((..(((.((.........((((((((((((((.((((..(((((((......................)))))))....))))..)))))))).)))))).....((((..........)))).....)).))).....))))..	82	27.8	-28	0.7	3	0	2.14708	0	low
14	20	PC-5p-1651_406	TGAAGATCTCTCAAACCTACGGT	23	scaffold00228	+	914	1107	cccttggattttttttgaacctagctttaagagatctcgcaggttcggtaccTGAAGATCTCTCAAACCTACGGTtctttcctttcccttttcttcctttccctttcccccttttatacctttctatccctttctatccctttctatccctttctagaAGGACGCAGCAAAGCGAGGCTCttcatccctgtttt	0						5'	New	gp4	.....((((.......((((((((.(((.((((((((..(((((.....))))).)))))))).))).))).))))).........................................((...................(((((((........))))))).(((......))).))......)))).......	61	43.8	-40.5	0.5	2148	1275	1537.31	1772.64	high
14	21	PC-3p-15073_50	AGGACGCAGCAAAGCGAGGCTC	22	scaffold00228	+	914	1107	cccttggattttttttgaacctagctttaagagatctcgcaggttcggtaccTGAAGATCTCTCAAACCTACGGTtctttcctttcccttttcttcctttccctttcccccttttatacctttctatccctttctatccctttctatccctttctagaAGGACGCAGCAAAGCGAGGCTCttcatccctgtttt	0						3'	New	gp4	.....((((.......((((((((.(((.((((((((..(((((.....))))).)))))))).))).))).))))).........................................((...................(((((((........))))))).(((......))).))......)))).......	61	43.8	-40.5	0.5	730	487	522.456	677.081	high
15	22	PC-5p-352109_2	TTTAGTAGATTTATAAGCGT	20	scaffold00038	+	44726	44942	tatttaggtattataggcgctggaatagcgtagttaactactattgctatatagggggaggtgcctagtattataaaTTTAGTAGATTTATAAGCGTaaagttcggctactgcgatagctatagcagggttagtatctatactagctgtaaatacgcgtatataTTTAGCTGTAAATTCTAGTTAttatcctcgatagtttcgattacgttatctag	0						5'	New	gp4	...................((((.(((((((((((....((((((........(((((..((..((((.(((.......((((((((.((((.(((((.......((((..((....))..))))..((((((((....)))))))).....))))).)))).)))).))))..))).))))..))..)))))))))))...)))))))))))))))	198	34.6	-53.9	0.7	9	0	6.44124	0	low
15	23	PC-3p-548890_1	TTTAGCTGTAAATTCTAGTTA	21	scaffold00038	+	44726	44942	tatttaggtattataggcgctggaatagcgtagttaactactattgctatatagggggaggtgcctagtattataaaTTTAGTAGATTTATAAGCGTaaagttcggctactgcgatagctatagcagggttagtatctatactagctgtaaatacgcgtatataTTTAGCTGTAAATTCTAGTTAttatcctcgatagtttcgattacgttatctag	0						3'	New	gp4	...................((((.(((((((((((....((((((........(((((..((..((((.(((.......((((((((.((((.(((((.......((((..((....))..))))..((((((((....)))))))).....))))).)))).)))).))))..))).))))..))..)))))))))))...)))))))))))))))	198	34.6	-53.9	0.7	1	0	0.715693	0	low
16	24	PC-5p-661882_1	TACCCTATAGGGAGAGGTCGGCGTA	25	scaffold00038	-	200811	201068	tataggacgaggatataataatagcgcggctttcgcgtagctagaacgtagcgcttaggttttctcccgatactcgggttcttaaacgatagatagactataaaggcactataTACCCTATAGGGGGAGGTCGGCGTAtaaatattattatcattatataactattctataaagctatttttatattttataatatataatataataataataataaataataTTTATACGCCGACCTGCCCCtagggtatacggtgc	0						5'	New	gp4	(((((...(((............(((((.....))))).((((.....)))).)))..((((...((((.....)))).....))))..........)))))...((((..((((((((..(((((.((((((((((((((((((((((((.(((((((...(((..(((((((.(((....))))))))))..)))..))))))).))).......))))))))))))))))))))).)))))))))))))..))))	153	34.1	-90.5	1	6	1	4.29416	1.39031	low
16	25	PC-3p-629838_1	TTTATACGCCGACTTGCCCC	20	scaffold00038	-	200811	201068	tataggacgaggatataataatagcgcggctttcgcgtagctagaacgtagcgcttaggttttctcccgatactcgggttcttaaacgatagatagactataaaggcactataTACCCTATAGGGGGAGGTCGGCGTAtaaatattattatcattatataactattctataaagctatttttatattttataatatataatataataataataataaataataTTTATACGCCGACCTGCCCCtagggtatacggtgc	0						3'	New	gp4	(((((...(((............(((((.....))))).((((.....)))).)))..((((...((((.....)))).....))))..........)))))...((((..((((((((..(((((.((((((((((((((((((((((((.(((((((...(((..(((((((.(((....))))))))))..)))..))))))).))).......))))))))))))))))))))).)))))))))))))..))))	153	34.1	-90.5	1	1	0	0.715693	0	low
17	26	PC-5p-217324_2	AAAGTATTTCGGATTATCGGGT	22	scaffold00108	-	2066	2210	ttaaataaaatcggaataaggAAAGTATTTCGGATTATCGGGCctagcgctcggagattaactatagctaagtaaagtactctaagcccttataatccgtaaatataataaacggggaataTACGCTATAAAGCTCGGATAACTA	0						5'	New	gp4	.........(((.((.........((((((((((((((.((((.(((.(((...((.....))..)))..((((...))))))).))))..)))))))).))))))..................(((....))))).))).....	82	35.2	-27.4	0.5	5	0	3.57847	0	low
17	27	PC-3p-807970_1	TACGCTATAAAGCTCGGATACCTA	24	scaffold00108	-	2066	2210	ttaaataaaatcggaataaggAAAGTATTTCGGATTATCGGGCctagcgctcggagattaactatagctaagtaaagtactctaagcccttataatccgtaaatataataaacggggaataTACGCTATAAAGCTCGGATAACTA	0						3'	New	gp4	.........(((.((.........((((((((((((((.((((.(((.(((...((.....))..)))..((((...))))))).))))..)))))))).))))))..................(((....))))).))).....	82	35.2	-27.4	0.5	2	0	1.43139	0	low
18	28	PC-5p-164768_3	AGGCTGCTGTGTGTTAGACGT	21	scaffold00038	+	237949	238168	tggtagaagacattatatggacattcatacttactcagaatcatgcgctgattcaactgattcctggacttttcggagtcatcAGGCTGCTGTGTGTTAGACGTctcggtcgtgtgTCGCATCCGGTCTGCGGCCTtgggcgttccaattgaccggtttaccggacaatggtacattcccaaaccggcacatcagggcgtttaaacatatacaacctcgc	0						5'	New	gp4	.(((((((..(((...)))....))).))))......((((((.....))))))...(((((((.(((...))))))))))..(((.((.(((((((((((((((..(((.((((((((((.......)))))).(((((.((.(((.(((.((((....)))).)))))).))...)))))....)))))))..))))))))).)))))))).)))...	134	49.1	-68.6	0.6	36	3	25.765	4.17093	middle
18	29	PC-3p-788624_1	TCGCATCCGGTCTGCGGCCT	20	scaffold00038	+	237949	238168	tggtagaagacattatatggacattcatacttactcagaatcatgcgctgattcaactgattcctggacttttcggagtcatcAGGCTGCTGTGTGTTAGACGTctcggtcgtgtgTCGCATCCGGTCTGCGGCCTtgggcgttccaattgaccggtttaccggacaatggtacattcccaaaccggcacatcagggcgtttaaacatatacaacctcgc	0						3'	New	gp4	.(((((((..(((...)))....))).))))......((((((.....))))))...(((((((.(((...))))))))))..(((.((.(((((((((((((((..(((.((((((((((.......)))))).(((((.((.(((.(((.((((....)))).)))))).))...)))))....)))))))..))))))))).)))))))).)))...	134	49.1	-68.6	0.6	3	1	2.14708	1.39031	low
19	30	PC-5p-2366_295	TAGGTTTGAGAGATCTTCAGG	21	scaffold00253	+	1	212	tttctttctcttcttcaccctttcccagttacagtatcccttcttctaagtaccaggaaaaggaaagaaccgTAGGTTTGAGAGATCTTCAGGttcgtaaccTGCGAGATCTCTTAAAGCtaggttcaaaaaaaatccaagggcgtaatcgaaataaataattgtcaaattagttattacgatctagtccttcctccagctaccgcaggaag	0						5'	New	gp4	..................(((((.((...(((.................)))...)).)))))...(((((.(((.(((((((((((((((((((...)))))).))))))))))))).))))))))...........((((((...((((.(((((.(((((....))))).))))).))))...))))))..(((.((....)).)))..	61	40.1	-61.8	0.7	1067	349	763.645	485.218	high
19	31	PC-3p-3147_232	TGCGAGATCTCTTAAAGC	18	scaffold00253	+	1	212	tttctttctcttcttcaccctttcccagttacagtatcccttcttctaagtaccaggaaaaggaaagaaccgTAGGTTTGAGAGATCTTCAGGttcgtaaccTGCGAGATCTCTTAAAGCtaggttcaaaaaaaatccaagggcgtaatcgaaataaataattgtcaaattagttattacgatctagtccttcctccagctaccgcaggaag	0						3'	New	gp4	..................(((((.((...(((.................)))...)).)))))...(((((.(((.(((((((((((((((((((...)))))).))))))))))))).))))))))...........((((((...((((.(((((.(((((....))))).))))).))))...))))))..(((.((....)).)))..	61	40.1	-61.8	0.7	405.5	358.5	290.214	498.426	high
20	32	PC-5p-31952_22	TACTCCAGTTGGATTAAGGCGG	22	scaffold00111	-	462	720	tactatggatcagtctgctccccttaatccaactggactaaagcggacagaatagattaataaaccttataaaatagactactatagctattactaatatatctaatagagcctattTACTCCAGTTGGATTAAGGCGGAcagaatagatttataaagctaataaagcgaatagaatagaatactatagctatagttaatatatctaatagaatagaatactatagatattgctactatatataatagatctatcttat	0						5'	New	gp4	...(((..(((..((((.(((((((((((((((((((.((((..((......(((((..((((...))))..(((((.(((...))))))))........)))))......))..)))).)))))))))))))))).)))))))...)))..)))..(((.....)))..(((..(((((.((.((((..((((((....(((((((.(((.........))))))))))....)))))))))).))..)))))..)))	152	28.6	-67.6	0.9	144	8	103.06	11.1225	middle
20	33	PC-3p-34075_20	TCCAGTTGGATTAAGGCGGT	20	scaffold00111	-	462	720	tactatggatcagtctgctccccttaatccaactggactaaagcggacagaatagattaataaaccttataaaatagactactatagctattactaatatatctaatagagcctattTACTCCAGTTGGATTAAGGCGGAcagaatagatttataaagctaataaagcgaatagaatagaatactatagctatagttaatatatctaatagaatagaatactatagatattgctactatatataatagatctatcttat	0						3'	New	gp4	...(((..(((..((((.(((((((((((((((((((.((((..((......(((((..((((...))))..(((((.(((...))))))))........)))))......))..)))).)))))))))))))))).)))))))...)))..)))..(((.....)))..(((..(((((.((.((((..((((((....(((((((.(((.........))))))))))....)))))))))).))..)))))..)))	152	28.6	-67.6	0.9	249	17	178.208	23.6353	middle
21	34	PC-5p-231631_2	AAGTATTTCGGATTATCGGGT	21	scaffold00043	-	152894	153071	gcgggccgcttataccccggaacgatattttaaatagaatcggaatagggaAAGTATTTCGGATTATCGGGCctagcgctcggagattagctatagttaagtaaagtactttaagcccttataatccgtaagtataataaacggggagcgtatattaTAAAGCTCGGACGATTATATT	0						5'	New	gp4	.(((((((((....(((((...((((.(((.....)))))))...........((((((((((((((.((((..((..((......(((((....)))))....))..))....))))..)))))))).))))))......)))))))))...........)))))............	82	39.9	-45.5	0.6	7	0.5	5.00985	0.695155	low
21	35	PC-3p-1519037_1	TAAAGCTCGGACGATTATATA	21	scaffold00043	-	152894	153071	gcgggccgcttataccccggaacgatattttaaatagaatcggaatagggaAAGTATTTCGGATTATCGGGCctagcgctcggagattagctatagttaagtaaagtactttaagcccttataatccgtaagtataataaacggggagcgtatattaTAAAGCTCGGACGATTATATT	0						3'	New	gp4	.(((((((((....(((((...((((.(((.....)))))))...........((((((((((((((.((((..((..((......(((((....)))))....))..))....))))..)))))))).))))))......)))))))))...........)))))............	82	39.9	-45.5	0.6	3	0	2.14708	0	low
22	36	PC-5p-982645_1	TAGTTTCCCTAGAGCTTATAGACCA	25	chr01	-	5385134	5385275	atagagtcttctataagctctaaagggtctatatgctctagggattctataggcaccgTAGTTTCCCTAGAGCTTATAGACCCtctagatctattagaaggtctcgaaggcatttagaagcCTAGATAAATTTATAGGGCTT	0						5'	New	gp4	...((((((((((..((.((((.((((((((((.((((((((((..((((.......))))..)))))))))).)))))))))).)))).))..))))))).)))............((((((..(((....))).))))))	102	39.4	-62.9	1.1	8	4	5.72555	5.56124	low
22	37	PC-3p-1339986_1	CTAGATAAATTTATAGGGCTT	21	chr01	-	5385134	5385275	atagagtcttctataagctctaaagggtctatatgctctagggattctataggcaccgTAGTTTCCCTAGAGCTTATAGACCCtctagatctattagaaggtctcgaaggcatttagaagcCTAGATAAATTTATAGGGCTT	0						3'	New	gp4	...((((((((((..((.((((.((((((((((.((((((((((..((((.......))))..)))))))))).)))))))))).)))).))..))))))).)))............((((((..(((....))).))))))	102	39.4	-62.9	1.1	7	0	5.00985	0	low
23	38	PC-5p-263235_2	TAAGCTAGTAGTATATCTATA	21	chr02	-	88670	88844	taaagctatttaagatatagatcttccgtacttttactTAAGCTAGTAGTATATCTATTgccccctacgcctaacccttaggggcctaggttagttatagcgtgcccgctaatcgggagatatatattagctataGGTTATAGTCGGAGCCCTTCtactttaatctctagctata	0						5'	New	gp4	...(((((....((((.((((..(((((.(((...((((((((((((.((((((((....(((.(((.(((((.(((....)))..))))))))...(((((....)))))...)))))))))))))))))).)))))...))))))))....)))).....)))).)))))...	169	39.4	-52.9	0.8	2	0	1.43139	0	low
23	39	PC-3p-1082382_1	GGTTATAGTCGGAGCCCTTA	20	chr02	-	88670	88844	taaagctatttaagatatagatcttccgtacttttactTAAGCTAGTAGTATATCTATTgccccctacgcctaacccttaggggcctaggttagttatagcgtgcccgctaatcgggagatatatattagctataGGTTATAGTCGGAGCCCTTCtactttaatctctagctata	0						3'	New	gp4	...(((((....((((.((((..(((((.(((...((((((((((((.((((((((....(((.(((.(((((.(((....)))..))))))))...(((((....)))))...)))))))))))))))))).)))))...))))))))....)))).....)))).)))))...	169	39.4	-52.9	0.8	2	0	1.43139	0	low
24	40	PC-5p-248229_2	TAGGCGGCGTTAGTAAAGCTCTT	23	chr02	-	82793	83004	agtcggggtagctataagggctttataaagcgctgctttaatctcttattataaatcctcctatataattagcTAGGCGGCGTTAGTAAAGCTCTTatatagagatttcgcagcttttatataatagctttcggtaatatttaggactacgtatactttatcctagccgattaagtctattagttattTCTCGAATACTTATAGCTTCTCTT	0						5'	New	gp4	....((((.(((((((((((((((((..((((((((((......((.((((((..........)))))).))..)))))))))).)))))))))))))...(((..((((.((........((((((((((((((......(((((..............))))))))))..))).)))))).......))))))..)))..)))).)))).	85	34	-54.9	0.8	11	1	7.87263	1.39031	low
24	41	PC-3p-855772_1	TCTCGAATACTTATAGCTTCTCTC	24	chr02	-	82793	83004	agtcggggtagctataagggctttataaagcgctgctttaatctcttattataaatcctcctatataattagcTAGGCGGCGTTAGTAAAGCTCTTatatagagatttcgcagcttttatataatagctttcggtaatatttaggactacgtatactttatcctagccgattaagtctattagttattTCTCGAATACTTATAGCTTCTCTT	0						3'	New	gp4	....((((.(((((((((((((((((..((((((((((......((.((((((..........)))))).))..)))))))))).)))))))))))))...(((..((((.((........((((((((((((((......(((((..............))))))))))..))).)))))).......))))))..)))..)))).)))).	85	34	-54.9	0.8	2	0	1.43139	0	low
25	42	PC-5p-242391_2	TCGCTATAAGTCTTAGAACTAA	22	chr09	-	662203	662374	tttcgaacggctttccgggaataataagataaacgcctTCGCTATAAGTCTTAGAACTATataagctatagatcttataggctttaatagctttagctatatctgtttaaagcttttcctaaaagtaaaggctTCGGATCCTTATAATAATCGTATTatagcccttatagct	0						5'	New	gp4	........((((....(((.((((((.(((..........(((((((((((.(((.(((((.....))))).)))...))))))..)))))......((((...(((..((((((((.(.....).))))))))..)))...))))...))).))))))..)))....))))	51	33.1	-38.3	0.7	7	0	5.00985	0	low
25	43	PC-3p-661282_1	TCGGATCCTTATAATAATCGTATG	24	chr09	-	662203	662374	tttcgaacggctttccgggaataataagataaacgcctTCGCTATAAGTCTTAGAACTATataagctatagatcttataggctttaatagctttagctatatctgtttaaagcttttcctaaaagtaaaggctTCGGATCCTTATAATAATCGTATTatagcccttatagct	0						3'	New	gp4	........((((....(((.((((((.(((..........(((((((((((.(((.(((((.....))))).)))...))))))..)))))......((((...(((..((((((((.(.....).))))))))..)))...))))...))).))))))..)))....))))	51	33.1	-38.3	0.7	3	0	2.14708	0	low
26	44	PC-5p-10035_77	TCTGACGATTGAATACTGACG	21	scaffold00119	-	2204	2413	tgattaatgaaaacatccttggcgaatgctttcgcagtagttagtcttcaatcgatccaagaatttcaccTCTGACGATTGAATACTGACGcccccgactgtccctattaatcattacggcggtccTAGAAACCAACAAAATAGAACcgcaacgtcctattctattattccatgctaatgtattcgagcataggcctgctttgaacactc	0						5'	New	gp4	(((((((((...(((((....(((((....)))))....((((((.((((((((.((..((........))..)))))))))).))))))......)).)))...)))))))))..((((((((.(((.............))).)))))..)))........................((.((((((((......))).))))).))..	51	42.4	-48.6	0.5	1035	151	740.742	209.937	high
26	45	PC-3p-63921_10	TAGAAACCAACAAAATAGAAC	21	scaffold00119	-	2204	2413	tgattaatgaaaacatccttggcgaatgctttcgcagtagttagtcttcaatcgatccaagaatttcaccTCTGACGATTGAATACTGACGcccccgactgtccctattaatcattacggcggtccTAGAAACCAACAAAATAGAACcgcaacgtcctattctattattccatgctaatgtattcgagcataggcctgctttgaacactc	0						3'	New	gp4	(((((((((...(((((....(((((....)))))....((((((.((((((((.((..((........))..)))))))))).))))))......)).)))...)))))))))..((((((((.(((.............))).)))))..)))........................((.((((((((......))).))))).))..	51	42.4	-48.6	0.5	167	99	119.521	137.641	middle
27	46	PC-5p-92307_6	TAGAACTTAGAAGGTAGAGA	20	scaffold00095	+	6299	6479	tatagtgggttatataacggattaggccctaccggcctatataaagggtaggccccggcccttctagaTAGAACTTAGAAGGTAGAGActagcttccttttagcacgTATAGTAAATCGCTGCGTCTAcgctgcttaactactaagtctaccctgcttactctacctataattctatctct	0						5'	New	gp4	......((((............((((((.....))))))......(((....)))..))))....((((((((.(((..((((((((...(((.......(((.((...(((((....((.(((....))).)).....))))).)))))....)))..)))))))).)))))))))))..	114	43.6	-52	0.7	17	0	12.1668	0	middle
27	47	PC-3p-704109_1	TATAGTAAATCGCTGCGTCTA	21	scaffold00095	+	6299	6479	tatagtgggttatataacggattaggccctaccggcctatataaagggtaggccccggcccttctagaTAGAACTTAGAAGGTAGAGActagcttccttttagcacgTATAGTAAATCGCTGCGTCTAcgctgcttaactactaagtctaccctgcttactctacctataattctatctct	0						3'	New	gp4	......((((............((((((.....))))))......(((....)))..))))....((((((((.(((..((((((((...(((.......(((.((...(((((....((.(((....))).)).....))))).)))))....)))..)))))))).)))))))))))..	114	43.6	-52	0.7	1	0	0.715693	0	low
28	48	PC-5p-9869_78	TGCGAGATCTCTTAAAGCTAGGTTC	25	scaffold00228	-	891	1074	aaagaaccgtaggtttgagagatcttcaggtaccgaaccTGCGAGATCTCTTAAAGCTAGGTTCaaaaaaaatccaagggcgtaatcgaaataaataattgtcaaattagttattacgatcTAGTCCTTCCTCCAGCTACCGCagggagctgttcttcagccaataaaaatataagtcaaactc	0						5'	New	gp4	...(((((.(((.((((((((((((((((((.....))))).))))))))))))).))))))))...........((((((...((((.(((((.(((((....))))).))))).))))...))))))....(((((.((....)))))))................................	61	39.1	-60.2	0.8	83	81.5	59.4025	113.31	middle
28	49	PC-3p-38264_18	TAGTCCTTCCTCCAGCTACCGC	22	scaffold00228	-	891	1074	aaagaaccgtaggtttgagagatcttcaggtaccgaaccTGCGAGATCTCTTAAAGCTAGGTTCaaaaaaaatccaagggcgtaatcgaaataaataattgtcaaattagttattacgatcTAGTCCTTCCTCCAGCTACCGCagggagctgttcttcagccaataaaaatataagtcaaactc	0						3'	New	gp4	...(((((.(((.((((((((((((((((((.....))))).))))))))))))).))))))))...........((((((...((((.(((((.(((((....))))).))))).))))...))))))....(((((.((....)))))))................................	61	39.1	-60.2	0.8	108.5	48.5	77.6527	67.43	middle
29	50	PC-3p-4530_168	TTGGGCACGTTGGGCTTTG	19	chr02	+	1862534	1862597	attcaaaactcgacgctgcatccaagaatcgcattcgctcatTTGGGCACGTTGAGCTTTGtgg	0						3'	New	gp4	...((((.(((((((.(((..(((((....((....))...))))))))))))))).))))...	58	48.4	-19.2	0.6	346	116	247.63	161.276	high
30	51	PC-3p-1350525_1	TGCCGTAGGGCTGGGAACATGGATC	25	chr06	-	1468042	1468283	gacccatgttatcgagctccggtacggactatgttgtccgtagaggcagggattttctccagacactatctgaggaaatataactaccagcccacctatgcacgggcgacagtttcagTGCCGTAGGGCTGGGAACATGGATCtgggactgtcgcattggttagcataagttcgccgcaaggcactccttacctacaacccaaccaagggttctttgcagggaaacagagctcggctggacc	0						3'	New	gp4	((.(((((((.((.(((((((((((.((...((((((((((..(((..(((..((((..((((.....))))..))))............))).)))....))))))))))...)).))))))..))))).))))))))).))..((....)).....(((((((...((((((((....)))..(((((......(((((......)))))......)))))....)))))..))).))))	143	53.3	-88.7	0.7	10	3	7.15693	4.17093	low
31	52	PC-5p-136623_4	TCGGCTTAGTATCGGTAACGT	21	chr07	+	2981414	2981510	tatagtcggcgatgctTCGGCTTAGTATCGGTAACGTaacgactgcgcttcggctataataagctttcggcggctatcggtattaagccttagccca	0						5'	New	gp4	.......((....(((..(((((((((((((((.(((..(((..((((....))........))..))))))..)))))))))))))))..))))).	89	49.5	-34.9	0.7	16	1	11.4511	1.39031	middle
32	53	PC-3p-355705_2	AGGCCTAATATCGTATCGCGGG	22	chr02	+	2170280	2170427	ataagccccggtagggcgttaggcggcttcttaaactactatattatcggccgccccgataataagatagccccgctaggtatctaagataatacggcgatatcgcagctaaagaAGGCCTAATATCGTATCGCGGGctatccccggg	0						3'	New	gp4	...((((((((((.(..(((((((..((((((...(((((.(((((((((.....))))))))))).)))....(((.((((((..............))))))..)))..)))))))))))))..).))))).))))).........	136	50.7	-52.9	0.7	14	1	10.0197	1.39031	middle
33	54	PC-5p-292833_2	TTGGTGTAGGACAAGCAACA	20	chr08	-	841050	841139	attTTGGTGTAGGACAAGCAACAtttcgggtcacgaccagggtgtgacttatttgttccgggcaaccgttgcttgctacctacaccgtcc	0						5'	New	gp4	....(((((((((.((((((((......((((((.((....))))))))..........((....))))))))))...)))))))))...	83	51.1	-38	0.8	7	6	5.00985	8.34186	low
34	55	PC-3p-183645_3	ATATTAGGGATAGTAGTAAGCTA	23	scaffold00260	+	2500	2599	ttataaagcttactactattagcctattattattaaaggccttatataatatagctatatataagaggaataATATTAGGGATAGTAGTAAGCTTtaaag	0						3'	New	gp4	...(((((((((((((((((..((((.(((((((......((((((((.........))))))))...))))))).)))))))))))))))))))))...	94	24	-35.1	1.5	17	3	12.1668	4.17093	middle
35	56	PC-5p-109000_5	AAGTATTTCGGATTATCGGGCG	22	chr04	-	37405	37510	agtagaattagaatagagaAAGTATTTCGGATTATCGGGCTtagcgcttaaagattagctatagctaagtaaagtactttaagcccttataatccgtaagtacgat	0						5'	New	gp4	.....................((((((((((((((.((((((((.((((.....(((((....)))))...))))...))))))))..)))))))).))))))...	82	34	-32.7	0.9	8.5	0	6.08339	0	low
36	57	PC-5p-286351_2	AAAGTATTTCGGATTATCGGGCT	23	chr07	+	2543868	2543982	gatattttaagtagaatcggaatagggAAAGTATTTCGGATTATCGGGCTtagcgctcggagattagctatagttaagtaaagtactttaagcccttataatccgtaagtacgat	0						5'	New	gp4	..............................((((((((((((((.((((((((.(((......(((((....)))))....)))...))))))))..)))))))).))))))...	82	36.5	-29.2	0.7	8	0	5.72555	0	low
37	58	PC-3p-149663_4	TGATAGTTGGTTCGTGGTAGT	21	chr01	+	2879512	2879677	accattccatctagatacaacttgacatatgttggaacataccaactactacgaaccaactatcagagtgaccacccctaacagaaccagaaagtgactctgctcTGATAGTTGGTTCGTGGTAGTtaatatgttccaacaacatacctgtagctcctggagtccg	0						3'	New	gp4	...((((((...((.((((...((.....((((((((((((..((((((((((((((((((((((((((((.(((..................)))..)).))))))))))))))))))))))))))..)))))))))))).))....)))).))..))))))...	160	43.4	-68.6	1	11	0	7.87263	0	low
38	59	PC-3p-1290049_1	TCGGAAAGGAAGATGGAGTTCGA	23	chr01	+	725380	725467	ctatcacggaggagtcggtcaacaccattttctaaattctgctagcTCGGAAAGGAAGATGGAGTTCGAtcctactccgaagtgacgc	0						3'	New	gp4	...((((...(((((.(((((((.(((((((((...(((((......))))).))))))))).))).)).)).)))))...))))...	82	48.9	-32.6	0.8	2	1	1.43139	1.39031	low
39	60	PC-5p-128213_4	TAACTATAAGTAGAGCGCTC	20	chr08	-	277114	277212	gtagatattactcTAACTATAAGTAGAGCGCTTatatataataattacagtagtaacctttatagagtactttgctatagttatagggttaatattatt	0						5'	New	gp4	...((((((((((((((((((.((((((..(((...(((((...((((....))))...))))))))..))))))))))))..))))).)))))))...	93	25.3	-26.2	1	12	0	8.58832	0	low
40	61	PC-3p-92107_6	TCGCAAGACTGTCCTGCTTGGCA	23	chr05	-	1963546	1963665	gacccaagcagggcagtcttgcgattggcttcgtcatctgggtcaagccctttgcagggtttgggggccagctatctcagaagacagaaccaaTCGCAAGACTGTCCTGCTTGGCAatgg	0						3'	New	gp4	...(((((((((((((((((((((((((.((((((.((((((.((((((((....))))))))..((....))..)))))).))).))))))))))))))))))))))))))))......	111	55.8	-73.7	1.1	70	0	50.0985	0	middle

## Sheet: Table S5
Table S5 Target genes of Vm-milRNAs identified by degradome sequencing and analysis
SmallRNA	SmallRNA_seq	Target gene	Target gene annotation	GO_Term	KEGG_pathways	KOG_Description	Symbol	AlignmentScore	AlignmentRange	DegradomeDetection	BVm_TPB	MVm_TPB	pvalue(chis_quare2x2)	pvalue(fisher_exact_test)	up/down	log2(fold_change)	DegradomeCleavageSite	MD2_DegradomeReadNumber_Raw	MD2_DegradomeReadNumber_Normalized	MVm_DegradomeReadNumber_Raw	MVm_DegradomeReadNumber_Normalized	MD2_DegradomeCategory	MVm_DegradomeCategory	MD2_Degradome_Pvalue	MVm_Degradome_Pvalue	MD2_Tplot_file_path	MVm_Tplot_file_path
PC-5p-31952_22	TACTCCAGTTGGATTAAGGCGG	VM1G_10292	pantoate--beta-alanine ligase	GO:0005737(cytoplasm);GO:0005524(ATP binding);GO:0004592(pantoate-beta-alanine ligase activity);GO:0015940(pantothenate biosynthetic process)	ko00410(beta-Alanine metabolism);ko00770(Pantothenate and CoA biosynthesis)	[H] Coenzyme transport and metabolism	panC	7	899-920	Y	0	309.682	0.0076423	0.00163733	down	-	911			5	5		2		0.624276	NA	.\4_T_Plot\MVm\VM1G_10292--911--PC-5p-63050_22_degradome.jpg
PC-5p-164768_3	AGGCTGCTGTGTGTTAGACGT	VM1G_00825	acetyl-CoA carboxylase / biotin carboxylase	GO:0005829(cytosol);GO:0000329(fungal-type vacuole membrane);GO:0003989(acetyl-CoA carboxylase activity);GO:0005524(ATP binding);GO:0004075(biotin carboxylase activity);GO:0046872(metal ion binding);GO:0042759(long-chain fatty acid biosynthetic process);GO:0007088(regulation of mitosis)	ko00061(Fatty acid biosynthesis);ko00620(Pyruvate metabolism);ko00640(Propanoate metabolism);ko04910(Insulin signaling pathway)	[I] Lipid transport and metabolism	cut6	6	6062-6081	Y	0	371.618	0.0034744	0.000347349	down	-	6073			6	6		2		0.997187	NA	.\4_T_Plot\MVm\VM1G_00825--6073--PC-5p-393516_3_degradome.jpg
	AGGCTGCTGTGTGTTAGACGT	VM1G_02980	-	GO:0016021(integral to membrane);GO:0045121(membrane raft);GO:0005886(plasma membrane);GO:0005515(protein binding);GO:0007165(signal transduction)	-	[C] Energy production and conversion	Stoml3	7	1313-1332	Y	0	371.618	0.0034744	0.000347349	down	-	1324			6	6		2		0.993327	NA	.\4_T_Plot\MVm\VM1G_02980--1324--PC-5p-393516_3_degradome.jpg
PC-3p-92107_6	TCGCAAGACTGTCCTGCTTGGCA	VM1G_02763	-	GO:0005794(Golgi apparatus);GO:0016021(integral to membrane);GO:0031902(late endosome membrane);GO:0004872(receptor activity);GO:0015031(protein transport)	-	[R] General function prediction only	VPS10	5.5	4445-4468	Y	83.5243	123.873	0	6.39701e-81	down	-0.568592	4459	1	1	2	2	4	2	0.0374538	0.369132	.\4_T_Plot\BVm\VM1G_02763--4459--PC-3p-199167_6_degradome.jpg	.\4_T_Plot\MVm\VM1G_02763--4459--PC-3p-199167_6_degradome.jpg
PC-5p-122130_5	TAGGCGTAAACTCTATTCGT	VM1G_00814	PTK9 protein tyrosine kinase 9	GO:0016021(integral to membrane);GO:0005743(mitochondrial inner membrane);GO:0005488(binding);GO:0005469(succinate:fumarate antiporter activity)	-	[C] Energy production and conversion	SFC1	7	1055-1073	Y	83.5243	247.746	0	1.52075e-61	down	-1.56859	1064	1	1	4	4	4	1	0.248962	0.0167244	.\4_T_Plot\BVm\VM1G_00814--1064--PC-5p-290084_5_degradome.jpg	.\4_T_Plot\MVm\VM1G_00814--1064--PC-5p-290084_5_degradome.jpg
	TAGGCGTAAACTCTATTCGT	VM1G_03440	cytochrome c	GO:0005759(mitochondrial matrix);GO:0070469(respiratory chain);GO:0009055(electron carrier activity);GO:0020037(heme binding);GO:0022900(electron transport chain);GO:0006810(transport)	ko04115(p53 signaling pathway);ko04210(Apoptosis)	[C] Energy production and conversion	cyc-1	6	149-167	Y	0	309.682	0.0076423	0.00163733	down	-	159			5	5		3		0.275168	NA	.\4_T_Plot\MVm\VM1G_03440--159--PC-5p-290084_5_degradome.jpg
PC-5p-136623_4	TCGGCTTAGTATCGGTAACGT	VM1G_03006	alcohol dehydrogenase	GO:0005737(cytoplasm);GO:0004022(alcohol dehydrogenase (NAD) activity);GO:0008270(zinc ion binding)	ko00010(Glycolysis / Gluconeogenesis);ko00071(Fatty acid metabolism);ko00350(Tyrosine metabolism);ko00624(1- and 2-Methylnaphthalene degradation);ko00641(3-Chloroacrylic acid degradation);ko00830(Retinol metabolism);ko00980(Metabolism of xenobiotics by cytochrome P450);ko00982(Drug metabolism - cytochrome P450)	[Q] Secondary metabolites biosynthesis, transport and catabolism	adh-1	6.5	1582-1601	Y	83.5243	1114.86	1.9229e-28	2.38645e-19	down	-3.73852	1593	1	1	18	18	4	2	0.227149	0.955374	.\4_T_Plot\BVm\VM1G_03006--1593--PC-3p-300483_4_degradome.jpg	.\4_T_Plot\MVm\VM1G_03006--1593--PC-3p-300483_4_degradome.jpg
	TTCGGCTTAGTATCGGTAACGT	VM1G_04236	-	-	-	-	-	6.5	188-209	Y	0	371.618	0.0034744	0.000347349	down	-	200			6	6		0		0.00818234	NA	.\4_T_Plot\MVm\VM1G_04236--200--PC-5p-618434_2_degradome.jpg
PC-3p-355705_2	AGGCCTAATATCGTATCGCGGG	VM1G_06294	-	-	-	-	-	6.5	840-860	Y	0	1981.96	1.35e-11	5.04202e-20	down	-	851			32	32		2		0.437758	NA	.\4_T_Plot\MVm\VM1G_06294--851--PC-3p-864378_2_degradome.jpg
PC-5p-2366_295	TAGGTTTGAGAGATCTTCAGG	VM1G_02768	-	GO:0005730(nucleolus);GO:0032040(small-subunit processome);GO:0006364(rRNA processing)	-	[R] General function prediction only	utp23	6	2227-2246	Y	0	433.555	0.0015956	0.000116059	down	-	2237			7	7		2		0.988795	NA	.\4_T_Plot\MVm\VM1G_02768--2237--PC-5p-5461_295_degradome.jpg
	TAGGTTTGAGAGATCTTCAGG	VM1G_08726	-	-	-	-	-	7	1167-1188	Y	0	309.682	0.0076423	0.00163733	down	-	1179			5	5		2		0.977639	NA	.\4_T_Plot\MVm\VM1G_08726--1179--PC-5p-5461_295_degradome.jpg
PC-3p-15073_50	AGGACGCAGCAAAGCGAGGCTC	VM1G_00573	-	-	-	-	-	7	873-895	Y	0	247.746	0.017048	0.00796971	down	-	886			4	4		1		0.00532662	NA	.\4_T_Plot\MVm\VM1G_00573--886--PC-3p-38451_37_degradome.jpg
PC-3p-3147_232	TGCGAGATCTCTTAAAGC	VM1G_03399	allantoicase	GO:0016323(basolateral plasma membrane);GO:0005737(cytoplasm);GO:0005856(cytoskeleton);GO:0005515(protein binding);GO:0045184(establishment of protein localization);GO:0007165(signal transduction)	ko00230(Purine metabolism)	[M] Cell wall/membrane/envelope biogenesis	ANK3	7	1816-1833	Y	83.5243	0	0	2.08009e-139	up	-	1824	1	1			4		0.818817		.\4_T_Plot\BVm\VM1G_03399--1824--PC-3p-16637_94_degradome.jpg	NA
	TGCGAGATCTCTTAAAGC	VM1G_00903	-	-	-	-	-	7	1043-1059	Y	83.5243	433.555	0	3.32608e-45	down	-2.37595	1051	1	1	7	7	4	2	0.818817	1	.\4_T_Plot\BVm\VM1G_00903--1051--PC-3p-16637_94_degradome.jpg	.\4_T_Plot\MVm\VM1G_00903--1051--PC-3p-16637_94_degradome.jpg
	TGCGAGATCTCTTAAAGC	VM1G_07631	-	GO:0005737(cytoplasm);GO:0008270(zinc ion binding)	-	[T] Signal transduction mechanisms	MICALL2	5.5	2196-2212	Y	334.097	0	0	0	up	-	2204	4	4			2		0.143867		.\4_T_Plot\BVm\VM1G_07631--2204--PC-3p-16637_94_degradome.jpg	NA
	TGCGAGATCTCTTAAAGC	VM1G_01328	serine/threonine-protein kinase TTK/MPS1	GO:0000778(condensed nuclear chromosome kinetochore);GO:0005635(nuclear envelope);GO:0005816(spindle pole body);GO:0005524(ATP binding);GO:0004674(protein serine/threonine kinase activity);GO:0004712(protein serine/threonine/tyrosine kinase activity);GO:0007094(mitotic cell cycle spindle assembly checkpoint);GO:0031134(sister chromatid biorientation);GO:0051225(spindle assembly);GO:0007103(spindl…	ko04110(Cell cycle);ko04111(Cell cycle - yeast)	[D] Cell cycle control, cell division, chromosome partitioning	MPS1	6.5	3025-3042	Y	83.5243	123.873	0	6.39701e-81	down	-0.568592	3033	1	1	2	2	4	2	0.739618	1	.\4_T_Plot\BVm\VM1G_01328--3033--PC-3p-16637_94_degradome.jpg	.\4_T_Plot\MVm\VM1G_01328--3033--PC-3p-16637_94_degradome.jpg
	TGCGAGATCTCTTAAAGC	VM1G_11095	citrate synthase	GO:0005759(mitochondrial matrix);GO:0050440(2-methylcitrate synthase activity);GO:0044262(cellular carbohydrate metabolic process);GO:0019679(propionate metabolic process, methylcitrate cycle);GO:0006099(tricarboxylic acid cycle)	ko00020(Citrate cycle (TCA cycle));ko00630(Glyoxylate and dicarboxylate metabolism)	[C] Energy production and conversion	mcsA	6	1687-1705	Y	83.5243	557.428	4.9084e-76	5.37756e-38	down	-2.73852	1696	1	1	9	9	4	2	0.909726	1	.\4_T_Plot\BVm\VM1G_11095--1696--PC-3p-16637_94_degradome.jpg	.\4_T_Plot\MVm\VM1G_11095--1696--PC-3p-16637_94_degradome.jpg
	TGCGAGATCTCTTAAAGC	VM1G_09589	-	-	-	[R] General function prediction only	SDR3a	6	811-827	Y	83.5243	929.046	3.6121e-38	5.95646e-24	down	-3.47548	819	1	1	15	15	4	2	0.909726	1	.\4_T_Plot\BVm\VM1G_09589--819--PC-3p-16637_94_degradome.jpg	.\4_T_Plot\MVm\VM1G_09589--819--PC-3p-16637_94_degradome.jpg
	TGCGAGATCTCTTAAAGC	VM1G_10323	-	GO:0005794(Golgi apparatus);GO:0032266(phosphatidylinositol-3-phosphate binding);GO:0008270(zinc ion binding);GO:0006896(Golgi to vacuole transport);GO:0006904(vesicle docking involved in exocytosis);GO:0006906(vesicle fusion)	-	[R] General function prediction only	pep7	7	2222-2240	Y	0	1300.66	4.4034e-08	2.94684e-13	down	-	2230			21	21		2		1	NA	.\4_T_Plot\MVm\VM1G_10323--2230--PC-3p-16637_94_degradome.jpg
	TGCGAGATCTCTTAAAGC	VM1G_06798	-	GO:0015934(large ribosomal subunit);GO:0019843(rRNA binding);GO:0003735(structural constituent of ribosome);GO:0000049(tRNA binding);GO:0006417(regulation of translation);GO:0006412(translation)	-	-	rplA	6	725-743	Y	0	619.364	0.0001607	1.75172e-06	down	-	733			10	10		2		1	NA	.\4_T_Plot\MVm\VM1G_06798--733--PC-3p-16637_94_degradome.jpg
	TGCGAGATCTCTTAAAGC	VM1G_06611	elongation factor EF-1 gamma subunit	GO:0005853(eukaryotic translation elongation factor 1 complex);GO:0005634(nucleus);GO:0005509(calcium ion binding);GO:0005543(phospholipid binding);GO:0003713(transcription coactivator activity);GO:0003746(translation elongation factor activity);GO:0045944(positive regulation of transcription from RNA polymerase II promoter);GO:0042254(ribosome biogenesis)	-	[J] Translation, ribosomal structure and biogenesis	CAM1	5.5	1052-1069	Y	0	619.364	0.0001607	1.75172e-06	down	-	1060			10	10		2		0.99995	NA	.\4_T_Plot\MVm\VM1G_06611--1060--PC-3p-16637_94_degradome.jpg
	TGCGAGATCTCTTAAAGC	VM1G_11372	-	-	-	-	-	5.5	127-144	Y	0	371.618	0.0034744	0.000347349	down	-	135			6	6		2		0.99995	NA	.\4_T_Plot\MVm\VM1G_11372--135--PC-3p-16637_94_degradome.jpg
	TGCGAGATCTCTTAAAGC	VM1G_09340	-	-	-	-	-	6.5	2501-2518	Y	0	309.682	0.0076423	0.00163733	down	-	2509			5	5		2		1	NA	.\4_T_Plot\MVm\VM1G_09340--2509--PC-3p-16637_94_degradome.jpg
	TGCGAGATCTCTTAAAGC	VM1G_00064	high-affinity iron transporter	GO:0033573(high affinity iron permease complex);GO:0016021(integral to membrane);GO:0005381(iron ion transmembrane transporter activity);GO:0005515(protein binding);GO:0006827(high-affinity iron ion transport);GO:0033215(iron assimilation by reduction and transport)	-	-	FTR1	6	1238-1255	Y	0	309.682	0.0076423	0.00163733	down	-	1246			5	5		2		1	NA	.\4_T_Plot\MVm\VM1G_00064--1246--PC-3p-16637_94_degradome.jpg
PC-3p-149663_4	TGATAGTTGGTTCGTGGTAGT	VM1G_09539	V-type H+-transporting ATPase subunit B	GO:0033180(proton-transporting V-type ATPase, V1 domain);GO:0005524(ATP binding);GO:0046933(hydrogen ion transporting ATP synthase activity, rotational mechanism);GO:0046961(proton-transporting ATPase activity, rotational mechanism);GO:0015991(ATP hydrolysis coupled proton transport)	ko00190(Oxidative phosphorylation);ko04145(Phagosome);ko04966(Collecting duct acid secretion)	[C] Energy production and conversion	vma-2	6	920-941	Y	83.5243	123.873	0	6.39701e-81	down	-0.568592	932	1	1	2	2	4	3	0.402701	0.359553	.\4_T_Plot\BVm\VM1G_09539--932--PC-3p-310267_4_degradome.jpg	.\4_T_Plot\MVm\VM1G_09539--932--PC-3p-310267_4_degradome.jpg
	TGATAGTTGGTTCGTGGTAGT	VM1G_04444	NADH dehydrogenase (ubiquinone) 1 alpha subcomplex 5	GO:0005743(mitochondrial inner membrane);GO:0070469(respiratory chain);GO:0016651(oxidoreductase activity, acting on NADH or NADPH);GO:0022904(respiratory electron transport chain);GO:0006810(transport)	ko00190(Oxidative phosphorylation)	-	nuo-32	7	655-675	Y	167.049	495.491	0	1.28601e-120	down	-1.56859	666	2	2	8	8	2	2	0.0696982	0.990014	.\4_T_Plot\BVm\VM1G_04444--666--PC-3p-310267_4_degradome.jpg	.\4_T_Plot\MVm\VM1G_04444--666--PC-3p-310267_4_degradome.jpg
PC-5p-128213_4	TAACTATAAGTAGAGCGCTC	VM1G_10968	cyclopropane-fatty-acyl-phospholipid synthase	-	-	-	-	7	1372-1390	Y	0	340.65	0.0051454	0.000751277	down	-	1382			11	5.5		2		0.887874	NA	.\4_T_Plot\MVm\VM1G_10968--1382--PC-5p-342298_4_degradome.jpg
	TAACTATAAGTAGAGCGCTC	VM1G_10967	cyclopropane-fatty-acyl-phospholipid synthase	GO:0003838(sterol 24-C-methyltransferase activity);GO:0016126(sterol biosynthetic process)	-	-	ERG6	7	1372-1390	Y	0	340.65	0.0051454	0.000751277	down	-	1382			11	5.5		2		0.887874	NA	.\4_T_Plot\MVm\VM1G_10967--1382--PC-5p-342298_4_degradome.jpg
PC-3p-4530_168	TTGGGCACGTTGGGCTTTG	VM1G_11253	-	GO:0006417(regulation of translation)	-	[S] Function unknown	impact	6.5	1512-1531	Y	41.7621	0	0	5.04907e-70	up	-	1521	1	0.5			4		0.907105		.\4_T_Plot\BVm\VM1G_11253--1521--PC-3p-11766_136_degradome.jpg	NA
	TTGGGCACGTTGGGCTTTG	VM1G_07261	-	GO:0006417(regulation of translation)	-	[S] Function unknown	impact	6.5	1512-1531	Y	41.7621	0	0	5.04907e-70	up	-	1521	1	0.5			4		0.907105		.\4_T_Plot\BVm\VM1G_07261--1521--PC-3p-11766_136_degradome.jpg	NA
	TTGGGCACGTTGGGCTTTG	VM1G_04770	DnaJ homolog, subfamily C, member 2	GO:0005829(cytosol);GO:0031072(heat shock protein binding);GO:0051082(unfolded protein binding);GO:0006457(protein folding);GO:0006450(regulation of translational fidelity)	-	[O] Posttranslational modification, protein turnover, chaperones	zuo1	7	1345-1362	Y	334.097	0	0	0	up	-	1354	4	4			0		0.0480105		.\4_T_Plot\BVm\VM1G_04770--1354--PC-3p-11766_136_degradome.jpg	NA
	TTGGGCACGTTGGGCTTTG	VM1G_10029	protein phosphatase	GO:0005829(cytosol);GO:0005634(nucleus);GO:0008287(protein serine/threonine phosphatase complex);GO:0046872(metal ion binding);GO:0004722(protein serine/threonine phosphatase activity);GO:0030968(endoplasmic reticulum unfolded protein response);GO:0000173(inactivation of MAPK activity involved in osmosensory signaling pathway);GO:0006470(protein dephosphorylation)	-	[T] Signal transduction mechanisms	ptc2	6	1787-1804	Y	83.5243	0	0	2.08009e-139	up	-	1796	1	1			4		0.932201		.\4_T_Plot\BVm\VM1G_10029--1796--PC-3p-11766_136_degradome.jpg	NA
	TTGGGCACGTTGGGCTTTG	VM1G_02181	isocitrate dehydrogenase (NAD+)	GO:0005739(mitochondrion);GO:0004449(isocitrate dehydrogenase (NAD+) activity);GO:0000287(magnesium ion binding);GO:0051287(NAD binding);GO:0006099(tricarboxylic acid cycle)	ko00020(Citrate cycle (TCA cycle)	[E] Amino acid transport and metabolism	IDH1	6	1490-1507	Y	83.5243	681.3	3.8657e-59	2.53006e-32	down	-3.02802	1498	1	1	11	11	4	2	0.932201	1	.\4_T_Plot\BVm\VM1G_02181--1498--PC-3p-11766_136_degradome.jpg	.\4_T_Plot\MVm\VM1G_02181--1498--PC-3p-11766_136_degradome.jpg
	TTGGGCACGTTGGGCTTTG	VM1G_02403	-	-	-	-	-	6.5	2372-2390	Y	0	3654.25	3.4565e-20	1.53732e-36	down	-	2381			59	59		2		1	NA	.\4_T_Plot\MVm\VM1G_02403--2381--PC-3p-11766_136_degradome.jpg
	TTGGGCACGTTGGGCTTTG	VM1G_07697	phosphoglycerate mutase	GO:0005737(cytoplasm);GO:0030145(manganese ion binding);GO:0004619(phosphoglycerate mutase activity);GO:0006096(glycolysis)	ko00010(Glycolysis / Gluconeogenesis)	[G] Carbohydrate transport and metabolism	gpmI	6.5	1419-1436	Y	0	2539.39	1.8443e-14	1.94461e-25	down	-	1427			41	41		2		1	NA	.\4_T_Plot\MVm\VM1G_07697--1427--PC-3p-11766_136_degradome.jpg
	TTGGGCACGTTGGGCTTTG	VM1G_07984	-	GO:0005829(cytosol);GO:0005634(nucleus);GO:0008536(Ran GTPase binding);GO:0051301(cell division);GO:0000216(M/G1 transition of mitotic cell cycle);GO:0007067(mitosis);GO:0016973(poly(A)+ mRNA export from nucleus);GO:0006606(protein import into nucleus);GO:0007264(small GTPase mediated signal transduction)	-	[T] Signal transduction mechanisms	mog1	6.5	437-456	Y	0	2291.65	3.455e-13	3.58438e-23	down	-	446			37	37		2		1	NA	.\4_T_Plot\MVm\VM1G_07984--446--PC-3p-11766_136_degradome.jpg
	TTGGGCACGTTGGGCTTTG	VM1G_04561	fatty acid synthase subunit alpha, fungi type	GO:0004316(3-oxoacyl-[acyl-carrier-protein] reductase (NADPH) activity);GO:0004315(3-oxoacyl-[acyl-carrier-protein] synthase activity);GO:0004321(fatty-acyl-CoA synthase activity);GO:0008897(holo-[acyl-carrier-protein] synthase activity);GO:0000287(magnesium ion binding);GO:0006633(fatty acid biosynthetic process);GO:0009059(macromolecule biosynthetic process)	ko00061(Fatty acid biosynthesis)	-	FAS2	6.5	5916-5934	Y	0	2105.84	3.1145e-12	3.81917e-21	down	-	5925			34	34		2		1	NA	.\4_T_Plot\MVm\VM1G_04561--5925--PC-3p-11766_136_degradome.jpg
	TTGGGCACGTTGGGCTTTG	VM1G_11912	-	-	-	-	-	6	62-81	Y	0	2105.84	3.1145e-12	3.81917e-21	down	-	71			34	34		2		1	NA	.\4_T_Plot\MVm\VM1G_11912--71--PC-3p-11766_136_degradome.jpg
	TTGGGCACGTTGGGCTTTG	VM1G_04952	protein phosphatase	GO:0005524(ATP binding);GO:0004674(protein serine/threonine kinase activity)	-	[T] Signal transduction mechanisms	Pak4	6	198-217	Y	0	2105.84	3.1145e-12	3.81917e-21	down	-	207			34	34		2		1	NA	.\4_T_Plot\MVm\VM1G_04952--207--PC-3p-11766_136_degradome.jpg
	TTGGGCACGTTGGGCTTTG	VM1G_07199	H/ACA ribonucleoprotein complex subunit 4	GO:0000775(chromosome, centromeric region);GO:0005737(cytoplasm);GO:0005874(microtubule);GO:0005730(nucleolus);GO:0030529(ribonucleoprotein complex);GO:0003677(DNA binding);GO:0009982(pseudouridine synthase activity);GO:0003723(RNA binding);GO:0001522(pseudouridine synthesis);GO:0006364(rRNA processing)	-	[J] Translation, ribosomal structure and biogenesis	cbf5	6.5	1295-1313	Y	0	1734.22	2.544e-10	1.52381e-17	down	-	1304			28	28		2		1	NA	.\4_T_Plot\MVm\VM1G_07199--1304--PC-3p-11766_136_degradome.jpg
	TTGGGCACGTTGGGCTTTG	VM1G_08346	-	-	-	-	-	6	414-431	Y	0	1548.41	2.309e-09	9.71641e-16	down	-	422			25	25		2		1	NA	.\4_T_Plot\MVm\VM1G_08346--422--PC-3p-11766_136_degradome.jpg
	TTGGGCACGTTGGGCTTTG	VM1G_03726	-	GO:0016491(oxidoreductase activity);GO:0008270(zinc ion binding)	-	-	TOXD	6	791-809	Y	0	1548.41	2.309e-09	9.71641e-16	down	-	800			25	25		2		1	NA	.\4_T_Plot\MVm\VM1G_03726--800--PC-3p-11766_136_degradome.jpg
	TTGGGCACGTTGGGCTTTG	VM1G_04952	protein phosphatase	GO:0005524(ATP binding);GO:0004674(protein serine/threonine kinase activity)	-	[T] Signal transduction mechanisms	Pak4	6.5	85-103	Y	0	1300.66	4.4034e-08	2.94684e-13	down	-	94			21	21		2		1	NA	.\4_T_Plot\MVm\VM1G_04952--94--PC-3p-11766_136_degradome.jpg
	TTGGGCACGTTGGGCTTTG	VM1G_08663	-	GO:0016021(integral to membrane);GO:0031966(mitochondrial membrane);GO:0022891(substrate-specific transmembrane transporter activity);GO:0006623(protein targeting to vacuole)	ko00351(1,1,1-Trichloro-2,2-bis(4-chlorophenyl)ethane (DDT));ko00364(Fluorobenzoate degradation);ko00628(Fluorene degradation);ko00640(Propanoate metabolism)	[G] Carbohydrate transport and metabolism	VPS73	6.5	728-746	Y	0	1300.66	4.4034e-08	2.94684e-13	down	-	737			21	21		2		1	NA	.\4_T_Plot\MVm\VM1G_08663--737--PC-3p-11766_136_degradome.jpg
	TTGGGCACGTTGGGCTTTG	VM1G_04421	adenosylmethionine-8-amino-7-oxononanoate aminotransferase	-	ko00780(Biotin metabolism)	-	BIO3-BIO1	6.5	2373-2391	Y	0	1176.79	1.9314e-07	4.03887e-12	down	-	2382			19	19		2		1	NA	.\4_T_Plot\MVm\VM1G_04421--2382--PC-3p-11766_136_degradome.jpg
	TTGGGCACGTTGGGCTTTG	VM1G_10102	-	GO:0005524(ATP binding);GO:0000287(magnesium ion binding);GO:0005515(protein binding);GO:0004674(protein serine/threonine kinase activity)	-	[T] Signal transduction mechanisms ;[R] General function prediction only	MAST3	4.5	345-362	Y	0	1114.86	4.0506e-07	1.87963e-11	down	-	353			18	18		2		0.999937	NA	.\4_T_Plot\MVm\VM1G_10102--353--PC-3p-11766_136_degradome.jpg
	TTGGGCACGTTGGGCTTTG	VM1G_10102	-	GO:0005524(ATP binding);GO:0000287(magnesium ion binding);GO:0005515(protein binding);GO:0004674(protein serine/threonine kinase activity)	-	[T] Signal transduction mechanisms ;[R] General function prediction only	MAST3	6.5	429-446	Y	0	929.046	3.7644e-06	1.2095e-09	down	-	437			15	15		2		1	NA	.\4_T_Plot\MVm\VM1G_10102--437--PC-3p-11766_136_degradome.jpg
	TTGGGCACGTTGGGCTTTG	VM1G_06643	small subunit ribosomal protein S3Ae	GO:0005840(ribosome);GO:0003735(structural constituent of ribosome);GO:0006412(translation)	ko03010(Ribosome)	[J] Translation, ribosomal structure and biogenesis	RPS1	7	804-821	Y	0	867.109	7.9388e-06	5.68745e-09	down	-	813			14	14		2		1	NA	.\4_T_Plot\MVm\VM1G_06643--813--PC-3p-11766_136_degradome.jpg
	TTGGGCACGTTGGGCTTTG	VM1G_03002	-	-	-	-	-	5	146-164	Y	0	867.109	7.9388e-06	5.68745e-09	down	-	155			14	14		2		1	NA	.\4_T_Plot\MVm\VM1G_03002--155--PC-3p-11766_136_degradome.jpg
	TTGGGCACGTTGGGCTTTG	VM1G_00061	-	-	-	-	-	6	1096-1114	Y	0	681.3	7.5438e-05	3.67112e-07	down	-	1105			11	11		2		1	NA	.\4_T_Plot\MVm\VM1G_00061--1105--PC-3p-11766_136_degradome.jpg
	TTGGGCACGTTGGGCTTTG	VM1G_09785	-	GO:0005737(cytoplasm);GO:0004356(glutamate-ammonia ligase activity);GO:0048315(conidium formation);GO:0006807(nitrogen compound metabolic process);GO:0030435(sporulation resulting in formation of a cellular spore)	-	-	fluG	7	2733-2751	Y	0	619.364	0.0001607	1.75172e-06	down	-	2742			10	10		2		1	NA	.\4_T_Plot\MVm\VM1G_09785--2742--PC-3p-11766_136_degradome.jpg
	TTGGGCACGTTGGGCTTTG	VM1G_03964	chaperonin GroES	GO:0005759(mitochondrial matrix);GO:0005524(ATP binding);GO:0051082(unfolded protein binding);GO:0006457(protein folding);GO:0030150(protein import into mitochondrial matrix)	-	[O] Posttranslational modification, protein turnover, chaperones	hsp10	7	149-167	Y	0	619.364	0.0001607	1.75172e-06	down	-	158			10	10		2		1	NA	.\4_T_Plot\MVm\VM1G_03964--158--PC-3p-11766_136_degradome.jpg
	TTGGGCACGTTGGGCTTTG	VM1G_06032	-	GO:0016021(integral to membrane);GO:0005743(mitochondrial inner membrane);GO:0030007(cellular potassium ion homeostasis);GO:0071805(potassium ion transmembrane transport);GO:0051204(protein insertion into mitochondrial membrane)	-	[S] Function unknown	mdm28	6	1866-1884	Y	0	495.491	0.00073829	2.41041e-05	down	-	1875			8	8		2		1	NA	.\4_T_Plot\MVm\VM1G_06032--1875--PC-3p-11766_136_degradome.jpg
	TTGGGCACGTTGGGCTTTG	VM1G_07984	-	GO:0005829(cytosol);GO:0005634(nucleus);GO:0008536(Ran GTPase binding);GO:0051301(cell division);GO:0000216(M/G1 transition of mitotic cell cycle);GO:0007067(mitosis);GO:0016973(poly(A)+ mRNA export from nucleus);GO:0006606(protein import into nucleus);GO:0007264(small GTPase mediated signal transduction)	-	[T] Signal transduction mechanisms	mog1	6.5	359-377	Y	0	495.491	0.00073829	2.41041e-05	down	-	368			8	8		2		1	NA	.\4_T_Plot\MVm\VM1G_07984--368--PC-3p-11766_136_degradome.jpg
	TTGGGCACGTTGGGCTTTG	VM1G_05865	Rho family, other	GO:0030424(axon);GO:0005622(intracellular);GO:0005886(plasma membrane);GO:0005525(GTP binding);GO:0003924(GTPase activity);GO:0048846(axon extension involved in axon guidance);GO:0010171(body morphogenesis);GO:0033563(dorsal/ventral axon guidance);GO:0009792(embryo development ending in birth or egg hatching);GO:0043652(engulfment of apoptotic cell);GO:0040039(inductive cell migration);GO:0008045…	-	[R] General function prediction only	rac-2	6	2279-2296	Y	0	495.491	0.00073829	2.41041e-05	down	-	2288			8	8		2		1	NA	.\4_T_Plot\MVm\VM1G_05865--2288--PC-3p-11766_136_degradome.jpg
	TTGGGCACGTTGGGCTTTG	VM1G_02634	inorganic pyrophosphatase	GO:0005737(cytoplasm);GO:0004427(inorganic diphosphatase activity);GO:0000287(magnesium ion binding);GO:0006796(phosphate metabolic process)	ko00190(Oxidative phosphorylation)	[C] Energy production and conversion	ipp-1	7	1041-1060	Y	0	371.618	0.0034744	0.000347349	down	-	1050			6	6		2		1	NA	.\4_T_Plot\MVm\VM1G_02634--1050--PC-3p-11766_136_degradome.jpg
	TTGGGCACGTTGGGCTTTG	VM1G_11151	-	-	-	-	-	6	1287-1304	Y	0	309.682	0.0076423	0.00163733	down	-	1295			5	5		2		1	NA	.\4_T_Plot\MVm\VM1G_11151--1295--PC-3p-11766_136_degradome.jpg
	TTGGGCACGTTGGGCTTTG	VM1G_01547	argininosuccinate synthase	GO:0005829(cytosol);GO:0004055(argininosuccinate synthase activity);GO:0005524(ATP binding);GO:0006526(arginine biosynthetic process);GO:0000053(argininosuccinate metabolic process);GO:0000052(citrulline metabolic process)	ko00250(Alanine, aspartate and glutamate metabolism);ko00330(Arginine and proline metabolism)	[E] Amino acid transport and metabolism	ARG1	6.5	1252-1269	Y	0	309.682	0.0076423	0.00163733	down	-	1260			5	5		2		1	NA	.\4_T_Plot\MVm\VM1G_01547--1260--PC-3p-11766_136_degradome.jpg
	TTGGGCACGTTGGGCTTTG	VM1G_04853	ATP synthase mitochondrial F1 complex assembly factor 2	GO:0005739(mitochondrion);GO:0019904(protein domain specific binding);GO:0033615(mitochondrial proton-transporting ATP synthase complex assembly)	-	[C] Energy production and conversion	ATP12	6.5	1000-1018	Y	0	309.682	0.0076423	0.00163733	down	-	1009			5	5		2		1	NA	.\4_T_Plot\MVm\VM1G_04853--1009--PC-3p-11766_136_degradome.jpg
	TTGGGCACGTTGGGCTTTG	VM1G_01644	DnaJ homolog, subfamily A, member 2	GO:0005829(cytosol);GO:0005634(nucleus);GO:0005524(ATP binding);GO:0031072(heat shock protein binding);GO:0046872(metal ion binding);GO:0051082(unfolded protein binding);GO:0000226(microtubule cytoskeleton organization);GO:0006457(protein folding);GO:0015031(protein transport);GO:0009408(response to heat)	-	[O] Posttranslational modification, protein turnover, chaperones	mas5	6.5	1585-1604	Y	0	309.682	0.0076423	0.00163733	down	-	1595			5	5		2		1	NA	.\4_T_Plot\MVm\VM1G_01644--1595--PC-3p-11766_136_degradome.jpg

## Sheet: Table S6
Table S6 Typical siRNAs identified in this study
Index	Seq	GenomeID	Strand	Start	Count	Alignment	MVm	MD2	MVm(nom)	MD2(nom)	p value(chi_square)	log10(MVm(nom))	log10(MD2(nom))
1149_541	TAAGGACTGTGTAACAACTCACT	scaffold00119	+	4965	541	TCACTCAACAATGTGTCAGGAAT	119	422	24.0831	93.8417	2.6989e-24	1.38171	1.9724
9305_83	TCTTGAAACACGGACCAAGGAGC	scaffold00119	+	4352	83	CGAGGAACCAGGCACAAAGTTCT	0	83	0.0001	18.457	6.7744e-09	-4	1.26616
8611_90	TGAAGATCTCTCAAACCTACGGC	scaffold00228	+	965	90	TGAAGATCTCTCAAACCTACGGC	4	86	0.809515	19.1241	1.6484e-08	-0.0917753	1.28158
3024_241	TAAGGACTGTGTAACAACTCACA	scaffold00119	+	4965	241	ACACTCAACAATGTGTCAGGAAT	81	160	16.3927	35.5798	6.0235e-07	1.21465	1.5512
3489_212	GATTAACTTTGAAACTGGGTA	scaffold00228	+	1934	212	ATGGGTCAAAGTTTCAATTAG	211	1	42.7019	0.222374	1.3465e-06	1.63045	-0.652916
2860_252	TAAGGACTGTGTAACAACTCAT	scaffold00119	+	4965	252	TAAGGACTGTGTAACAACTCAT	92	160	18.6188	35.5798	3.1329e-06	1.26995	1.5512
3116_234	TCGAACTGTCTAGTAGCTGGG	scaffold00119	+	4628	234	TCGAACTGTCTAGTAGCTGGG	222	12	44.9281	2.66849	1.3367e-05	1.65252	0.426265
2114_324	AGAGCTCTTTCTTGATTTTGT	scaffold00119	+	2634	324	TGTTTTAGTTCTTTCTCGAGA	142	182	28.7378	40.472	5.79e-05	1.45845	1.60715
4881_156	TCGAACTGTCTAGTAGCTGGA	scaffold00119	+	4628	156	TCGAACTGTCTAGTAGCTGGA	150	6	30.3568	1.33424	0.00020836	1.48226	0.125235
5236_147	AATCGAACTGTCTAGTAGCTA	scaffold00119	+	4626	147	AATCGAACTGTCTAGTAGCTA	142	5	28.7378	1.11187	0.00025832	1.45845	0.0460536
2840_253	TCGAACTGTCTAGTAGCTGGC	scaffold00119	+	4628	253	TCGAACTGTCTAGTAGCTGGC	223	30	45.1304	6.67121	0.00057516	1.65447	0.824205
25039_29	TCTTGAAACACGGACCAAGGAGG	scaffold00119	+	4352	29	GGAGGAACCAGGCACAAAGTTCT	1	28	0.202379	6.22647	0.0011644	-0.693835	0.794242
7642_101	GCAGATCTTGGTGGTAGTAGT	scaffold00119	+	5138	101	GCAGATCTTGGTGGTAGTAGT	34	67	6.88088	14.899	0.0013284	0.837644	1.17316
17187_44	TAAGGACTGTGTAACAACTCATC	scaffold00119	+	4965	44	TAAGGACTGTGTAACAACTCATC	8	36	1.61903	8.00546	0.0020144	0.209255	0.903386
8984_86	TGTAACAACTCACCTGCCGAC	scaffold00119	+	4974	86	TGTAACAACTCACCTGCCGAC	85	1	17.2022	0.222374	0.0026984	1.23558	-0.652916
13458_56	TAAAGTAAAATTGTGGACCCAGT	scaffold00253	+	2248	56	TGACCCAGGTGTTAAAATGAAAT	15	41	3.03568	9.11733	0.0040217	0.482256	0.959867
23198_31	TGGTAAGCAGAACTGGCGATGT	scaffold00119	+	4832	31	TGGTAAGCAGAACTGGCGATGT	4	27	0.809515	6.00409	0.0041463	-0.0917753	0.778447
28499_25	TCTTGAAACACGGACCAAGGAGA	scaffold00119	+	4352	25	AGAGGAACCAGGCACAAAGTTCT	2	23	0.404757	5.1146	0.0050629	-0.392805	0.708811
16431_46	AAGGACTGTGTAACAACTCACT	scaffold00119	+	4966	46	AAGGACTGTGTAACAACTCACT	11	35	2.22617	7.78308	0.0052585	0.347557	0.891152
9686_80	CCCTGTTGAGCTTGACTCTAGC	scaffold00119	+	6094	80	CCCTGTTGAGCTTGACTCTAGC	28	52	5.6666	11.5634	0.0061401	0.753323	1.06309
9898_78	AGAGCTCTTTCTTGATTTTGC	scaffold00119	+	2634	78	AGAGCTCTTTCTTGATTTTGC	27	51	5.46422	11.3411	0.0061803	0.737529	1.05465
7980_97	GACCGATAGCGCACAAGTAGA	scaffold00119	+	4050	97	GACCGATAGCGCACAAGTAGA	37	60	7.48801	13.3424	0.0064877	0.874366	1.12523
11029_69	ACCGATAGCGCACAAGTAGAA	scaffold00119	+	4051	69	ACCGATAGCGCACAAGTAGAA	68	1	13.7618	0.222374	0.0077761	1.13867	-0.652916
24051_30	TGAAGATCTCTCAAACCTACGGG	scaffold00228	+	965	30	TGAAGATCTCTCAAACCTACGGG	5	25	1.01189	5.55934	0.0086217	0.00513476	0.745024
9983_77	TGAGAGCTCTTTCTTGATTTA	scaffold00119	+	2632	77	TGAGAGCTCTTTCTTGATTTA	74	3	14.976	0.667121	0.0094765	1.1754	-0.175795
11728_65	TAGGTTTGAGAGATCTTCAGA	scaffold00253	+	72	65	TAGGTTTGAGAGATCTTCAGA	64	1	12.9522	0.222374	0.010004	1.11234	-0.652916
26274_27	AAGGACTGTGTAACAACTCACCA	scaffold00119	+	4966	27	ACCACTCAACAATGTGTCAGGAA	5	22	1.01189	4.89222	0.016344	0.00513476	0.689506
13392_57	TAAGGACTGTGTAACAACTCG	scaffold00119	+	4965	57	TAAGGACTGTGTAACAACTCG	56	1	11.3332	0.222374	0.01663	1.05435	-0.652916
7658_101	AAGGACTGTGTAACAACTCAA	scaffold00119	+	4966	101	AAGGACTGTGTAACAACTCAA	91	10	18.4165	2.22374	0.018139	1.26521	0.347084
15401_49	AGTCGGAATCCGCTAAGGACC	scaffold00119	+	4952	49	AGTCGGAATCCGCTAAGGACC	16	33	3.23806	7.33833	0.021495	0.510285	0.865598
13156_58	TGAAGATCTCTCAAACCTACA	scaffold00228	+	965	58	TGAAGATCTCTCAAACCTACA	56	2	11.3332	0.444748	0.022323	1.05435	-0.351886
51958_12	TCATCTCCCGGCACGCACGCACC	scaffold00081	+	18053	12	TCATCTCCCGGCACGCACGCACC	0	12	0.0001	2.66849	0.027919	-4	0.426265
57895_11	TAATCAAACGGTCTGAAAATATTT	scaffold00253	+	2279	11	TTTATAAAAGTCTGGCAAACTAAT	0	11	0.0001	2.44611	0.035313	-4	0.388476
15267_50	TGGAAGTCGGAATCCGCTAAGA	scaffold00119	+	4948	50	AGAATCGCCTAAGGCTGAAGGT	18	32	3.64282	7.11596	0.036045	0.561437	0.852234
4150_182	AGTCGGAATCCGCTAAGGACT	scaffold00119	+	4952	182	AGTCGGAATCCGCTAAGGACT	93	89	18.8212	19.7913	0.040796	1.27465	1.29647
17398_43	TGAAACACGGACCAAGGAGTA	scaffold00119	+	4355	43	TGAAACACGGACCAAGGAGTA	42	1	8.4999	0.222374	0.041247	0.929414	-0.652916
23612_31	TGAAACTTAAAGAAATTGACGT	scaffold00119	+	2521	31	TGCAGTTAAAGAAATTCAAAGT	9	22	1.82141	4.89222	0.043432	0.260407	0.689506
60125_10	CGTCTTGAAACACGGACCAAGGAA	scaffold00119	+	4350	10	AAGGAACCAGGCACAAAGTTCTGC	0	10	0.0001	2.22374	0.044778	-4	0.347084
20647_35	TGGAACGAAATACTAGACTGG	scaffold00228	+	3773	35	GGTCAGATCATAAAGCAAGGT	35	0	7.08325	0.0001	0.047626	0.850233	-4
43758_15	TGATTAACTTTGAAACTGGGTT	scaffold00228	+	1933	15	TGATTAACTTTGAAACTGGGTT	2	13	0.404757	2.89086	0.04799	-0.392805	0.461027
